1 **Marine metabolomics: a method for the non-targeted measurement of**  
2 **metabolites in seawater by gas-chromatography mass spectrometry.**

3  
4 Emilia M Sogin<sup>1\*</sup>, Erik Puskas<sup>1</sup>, Nicole Dubilier<sup>1</sup>, Manuel Liebeke<sup>1\*</sup>

5 1-Max Planck Institute for Marine Microbiology, Celsiusstrasse 1, Bremen, Germany

6 \*Corresponding authors

7 Maggie Sogin, email: [esogin@mpi-bremen.de](mailto:esogin@mpi-bremen.de), tel: +49 421 2028-823

8 Manuel Liebeke email: [mliebeke@mpi-bremen.de](mailto:mliebeke@mpi-bremen.de), tel: +49 421 2028-822

9 **Abstract**

10 Microbial communities exchange molecules with their environment that play a major role in  
11 global biogeochemical cycles and climate. While extracellular metabolites are commonly  
12 measured in terrestrial and limnic ecosystems, the presence of salt in marine habitats has  
13 hampered non-targeted analyses of the ocean exo-metabolome. To overcome these limitations,  
14 we developed SeaMet, a gas chromatography-mass spectrometry (GC-MS) method that detects  
15 at minimum 107 metabolites down to nano-molar concentrations in less than one milliliter of  
16 seawater, and improves signal detection by 324 fold compared to standard methods for marine  
17 samples. To showcase the strengths of SeaMet, we used it to explore marine metabolomes *in*  
18 *vitro* and *in vivo*. For the former, we measured the production and consumption of metabolites  
19 during culture of a heterotrophic bacterium that is widespread in the North Sea. Our approach  
20 revealed successional uptake of amino acids, while sugars were not consumed, and highlight the  
21 power of exocellular metabolomics in providing insights into nutrient uptake and energy

22 conservation in marine microorganisms. For *in vivo* analyses, we applied SeaMet to explore the  
23 *in situ* metabolome of coral reef and mangrove sediment porewaters. Despite the fact that these  
24 ecosystems occur in nutrient-poor waters, we uncovered high concentrations of many different  
25 sugars and fatty acids, compounds predicted to play a key role for the abundant and diverse  
26 microbial communities in coral-reef and mangrove sediments. Our data demonstrate that SeaMet  
27 advances marine metabolomics by enabling a non-targeted and quantitative analysis of marine  
28 metabolites, thus providing new insights into nutrient cycles in the oceans.

29

### 30 **Importance**

31 The non-targeted, hypothesis-free approach using metabolomics to analyzing metabolites that  
32 occur in the oceans is less developed than for terrestrial and limnic ecosystems. The central  
33 challenge in marine metabolomics is that salt prevents the comprehensive analysis of metabolites  
34 in seawater. Building on previous sample preparation methods for metabolomics, we developed  
35 SeaMet, which overcomes the limitations of salt on metabolite detection. Considering the oceans  
36 contain the largest organic carbon pool on Earth, describing the marine metabolome using non-  
37 targeted approaches is critical for understanding the drivers behind element cycles, biotic  
38 interactions, ecosystem function, and atmospheric CO<sub>2</sub> storage. Our method complements both  
39 targeted marine metabolomic investigations as well as other ‘omics’ (e.g., genomics,  
40 transcriptomics and proteomics) level approaches by providing an avenue for studying the  
41 chemical interaction between marine microbes and their habitats.

## 42 **Introduction**

43 Marine microorganisms produce and stabilize the largest pool of organic carbon on Earth  
44 by exchanging molecules with their environment (1, 2). Marine microbes are also the basis for  
45 maintaining the long term storage of carbon dioxide (CO<sub>2</sub>) in the oceans, which plays a complex  
46 role in biogeochemical cycles with uncertain implications for global climate (3). While  
47 metagenomic and metatranscriptomic studies of the ocean, driven by low sequencing costs and  
48 projects like Tara Oceans (4), have deepened our knowledge of the identity and activity of  
49 marine microbes, these studies are limited in their ability to determine the molecules that  
50 contribute to the chemical complexity of marine habitats. New approaches are needed to permit  
51 equivalent surveys of the extracellular metabolome, or exometabolome of the ocean.

52 Exometabolomics provides an opportunity to directly characterize the molecular interaction  
53 between microbes and their environment by profiling the types of molecules cellular organisms  
54 secrete (5). In terrestrial and limnic systems, these studies have advanced our understanding of  
55 microbial communities in soil organic matter cycling (6, 7), overflow metabolism of cultivable  
56 microorganisms (8, 9) and chemical ecology of the environment (10, 11). While intracellular  
57 metabolomic analyses of tissues from marine microbial cells to invertebrates is becoming  
58 increasingly more common (12-14), the defining characteristic of marine habitats - high salt  
59 concentration - limits exometabolomic analyses of the oceans to studies that require salt removal  
60 prior to metabolite extraction (10, 15, 16).

61 Our knowledge of the metabolite composition of ocean habitats is restricted to methods that  
62 require sample preparation techniques that alter their molecular composition, or targeted  
63 approaches that measure a defined group of metabolites (17-19). The most common  
64 environmental profiling strategies in marine ecosystems rely on solid phase extraction (SPE)

65 techniques to remove salt prior to mass-spectrometry (MS) analyses (20, 21). These studies have  
66 demonstrated the role of microbial communities in producing recalcitrant dissolved organic  
67 matter (DOM) and provided insights into their role in long term carbon storage (22). However,  
68 the removal of salt from marine samples using SPE is accompanied by the co-removal of small  
69 polar compounds, which are the primary components of the labile organic matter pool (17).  
70 Consequently, SPE-based studies can only detect about 50% of the compounds that make up the  
71 DOM pool from the ocean, and fail to detect the majority of compounds involved in the central  
72 metabolism of cells. Furthermore, current DOM analytical approaches remain largely  
73 inaccessible for the majority of research institutions and projects. This is largely due to high  
74 instrumentation costs for high-resolution MS (coupled to liquid-chromatography or with direct-  
75 infusion), large sample volume requirements, and the relatively low-throughput in data  
76 acquisition.

77 Gas chromatography (GC)- MS analysis, on the other hand, is a high-throughput and  
78 widely available analytical method that allows for the detection of primary metabolites, small  
79 molecules that occur in central metabolic pathways across biological systems (23, 24). High  
80 reproducibility coupled to the widespread availability of annotation resources make GC-MS the  
81 “workhorse” of analytical chemistry facilities. GC-MS has allowed the identification of  
82 metabolites associated with human disease (25), detection of compounds that serve as  
83 environmental cues in foraging (26), description of metabolic fluxes within and between cells  
84 (27), and is used for environmental profiling of soils and microbial activity on land (6, 28).  
85 Despite its the power of detecting metabolites involved in central metabolism, exometabolomic  
86 studies using GC-MS from marine habitats are absent due to the inhibitory effects of salt on  
87 sample analysis.

88           The ocean metabolome remains largely undefined, despite a growing field of research  
89 exploring the molecular composition of DOM (1, 2, 20, 21). To more efficiently decipher ocean  
90 metabolism, cost-effective, high-throughput, and untargeted workflows that can readily identify  
91 and quantify molecules from high salinity environments are critical. Here, we present SeaMet, a  
92 marine metabolomics method that builds on previous GC-MS sample derivatization methods to  
93 enable metabolite detection in seawater. Using SeaMet, we demonstrate how our method can  
94 enhance our understanding of microbial metabolism in culture experiments and profiling of  
95 marine habitats.

96

## 97 **Results and Discussion**

98           SeaMet modifies the well-established two-step derivatization procedure, which permits  
99 the detection of non-volatile primary metabolites using GC-MS, and involves methoximation  
100 followed by trimethylsilylation (29). Like other GC-MS sample preparation techniques (30, 31),  
101 SeaMet removes liquid through vacuum drying prior to derivatization - a process that results in a  
102 salt pellet when working with marine samples, which restricts MS analysis. Our preliminary tests  
103 suggested that water locked within the dried salt crystals hindered the chemical reactions needed  
104 for GC-MS (**Fig. S1**). Our method overcomes this limitation by first eliminating residual water  
105 within the salt crystals and then extracting metabolites into the derivatization reagents (**Fig. 1A**).

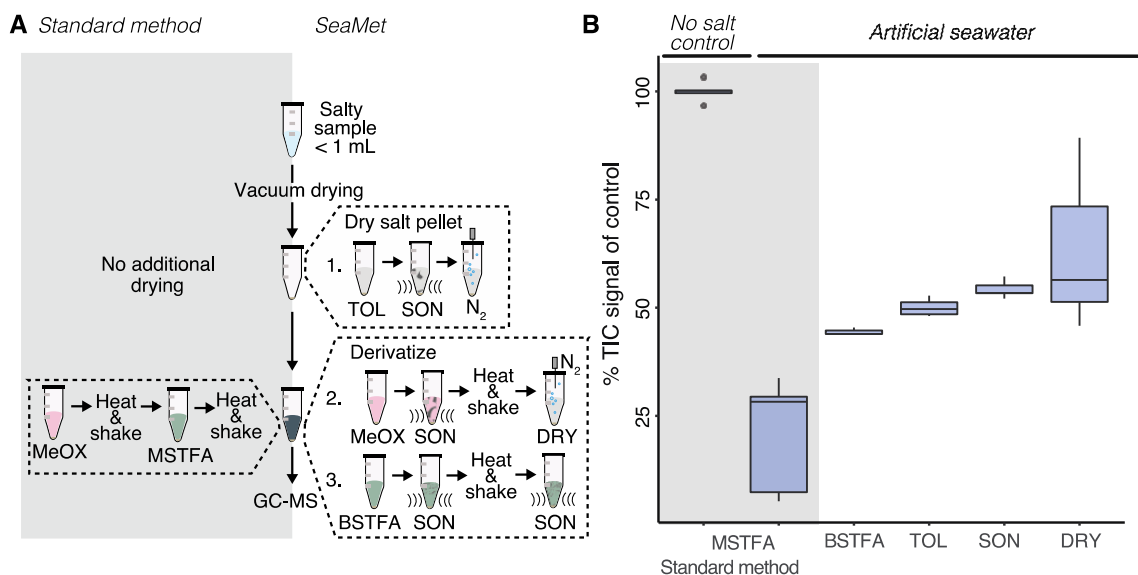

106  
 107 **Figure 1. How SeaMet works.** **A**, Modifications to the standard two-step methoximation (MeOX)-  
 108 trimethylsilylation (TMS) derivatization protocol include key steps that enhance metabolite signal  
 109 detection in seawater as shown in **B**. Steps modified from the standard method include a switch in  
 110 derivatization reagents from MSTFA to BSTFA, further drying of the salt pellet using toluene (TOL) to  
 111 remove water azeotropically, ultrasonication (SON) after the addition of TOL, MeOX, BSTFA, and after  
 112 BSTFA derivatization, and drying (DRY) of the pyridine after the MeOX derivatization prior to BSTFA  
 113 addition. **B**, Box plots showing changes in total ion chromatogram (TIC) signals after GC-MS data  
 114 acquisition. Results are from a synthetic mixture of 45 metabolites representing a broad scope of  
 115 metabolite classes (**Table S1**) dissolved in 0.5 mL of seawater ( $n = 5$ ) relative to average of the no salt  
 116 control.

117  
 118 We used a mixture of 45 different metabolites (**Table S1**) dissolved in artificial seawater  
 119 to 0.4 mM to document the performance in metabolite detection of our method. Overall, SeaMet  
 120 increased total signal intensity on average by 42% and up to 89% for high salinity samples in  
 121 comparison to the standard GC-MS sample preparation (**Fig. 1B**). We first replaced the most  
 122 commonly used trimethylsilylation reagent, N-methyl-N-(trimethylsilyl)trifluoroacetamide  
 123 (MSTFA)(31), with one that is less susceptible to inhibition by water, N, O-  
 124 Bistrifluoroacetamide (BSTFA), which resulted in higher metabolite signals (**Fig. S1B**). To

125 eliminate water from the samples, we increased the speed-vacuum drying time from four to eight  
126 hours, and integrated a toluene drying step that is used in urine-based metabolomic analyses (30).  
127 We further enhanced metabolite signals by treating the salt pellet to a combination of  
128 ultrasonication and vortexing after the addition of toluene and both derivatization reagents, and  
129 following completion of the trimethylsilylation reaction. These steps break apart the salt crystals  
130 and release water into the toluene to enhance salt drying and metabolite extraction. Finally,  
131 following a recently described method for improving GC-MS metabolite detection regardless of  
132 sample type (32), we included an additional step between the methoximation and  
133 trimethylsilylation derivatization reactions and evaporated the first derivatization reagent under  
134 N<sub>2</sub> gas (see **Fig. 1B** for total signal improvements of each step).

135 Overall, SeaMet allowed us to detect significant increases in metabolite abundances  
136 across molecular classes when compared to the standard method (adjusted *p*-value < 0.05; mean  
137 fold change across all ions = 323; **Fig. 2A**; **Fig. S2**). This included measurement of organic  
138 acids, amino acids, and fatty acids, as well as sugars (and their stereoisomers), sugar alcohols,  
139 and sterols (**Table S1**).

140 To determine the quantitative capabilities of SeaMet, we used a metabolite mixture (45  
141 metabolites spanning 9 compound classes) and added different concentrations (from 0.0039 mM-  
142 to 0.4 mM) to seawater. Our detection limits were in the nano-molar range and comparable to  
143 those of targeted techniques for marine ecosystems that were developed to quantify single  
144 compounds from specific molecular classes (**Tables S2**; **Table S3**). In contrast to previously  
145 published techniques, which require at least an order of magnitude higher sample volumes,  
146 SeaMet only requires 0.5 mL to 1 mL of seawater for metabolite detection (17, 33). Using  
147 SeaMet, we measured 107 metabolite standards in seawater, representing major metabolite

148 groups involved in primary metabolic pathways (**Table S4**). Our method provides reproducible  
149 quantification across metabolite classes ( $r^2 > 0.7$ ), and gives similar linearity and dynamic range  
150 in seawater samples compared to salt-free samples prepared with the standard GC-MS  
151 derivatization method (**Fig. 2A-H; Fig. S3**). Moreover, we demonstrate that SeaMet reduces  
152 variation in ion detection for individual metabolites (Welches t-test  $p$ -value  $< 0.01$  across all ions  
153 at 4 nmols; average %  $CV_{\text{salt}} = 20.2 \pm 0.78$ , average %  $CV_{\text{salt-free}} = 2.35 \pm 0.72$ ) compared to  
154 salt-free samples prepared with the standard GC-MS derivatization procedure (**Table S2**). The  
155 analytical characteristics of the 107 metabolites (**Table S4**) can be used for more sensitive,  
156 targeted GC-MS analyses or help in identifying metabolites in untargeted applications.  
157



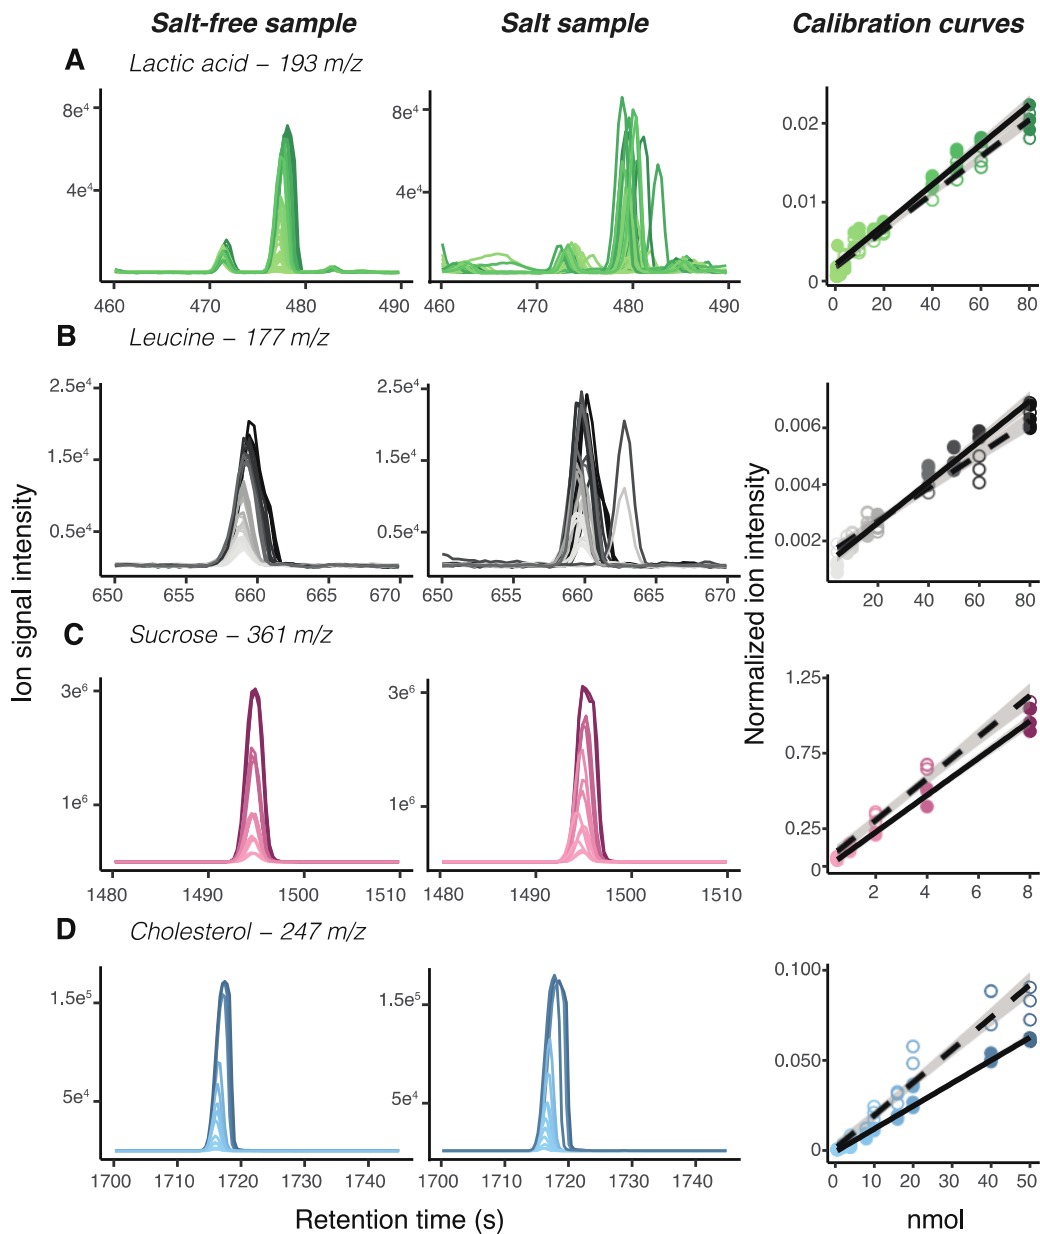

158

159

160 **Figure 2. Metabolite detection and quantification in seawater using SeaMet in comparison to salt-**  
161 **free water. A-D,** Extracted ion chromatograms for select metabolites in salt-free and artificial seawater  
162 demonstrate reproducible metabolite detection across concentration gradients, as shown in associated  
163 calibration curves on the right. Spectra and points are shaded in scale with sample concentrations, where  
164 more concentrated samples are represented by darker colors. Open circles = salt samples; filled circles =  
165 salt-free samples.

166

167           Given that SeaMet avoids SPE, we assessed how SPE sample treatment affects the ability  
168 to detect compounds in marine samples. We compared GC-MS profiles measured with SeaMet  
169 before and after salt removal using the most commonly used Bond Elut styrene-divinylbenzene  
170 (PPL) SPE-columns. Our analyses revealed that small polar compounds, such as sugars, sugar  
171 alcohols, amino acids, and organic acids, were co-removed with salt during SPE sample  
172 preparation (**Fig. 3B**). These results provide evidence that SeaMet captures compounds  
173 commonly missed by SPE-based exometabolomic approaches for marine samples. SeaMet thus  
174 expands the range of metabolites that can be measured by untargeted approaches beyond those  
175 currently used to characterize marine DOM, and contributes to advancing marine metabolomics.

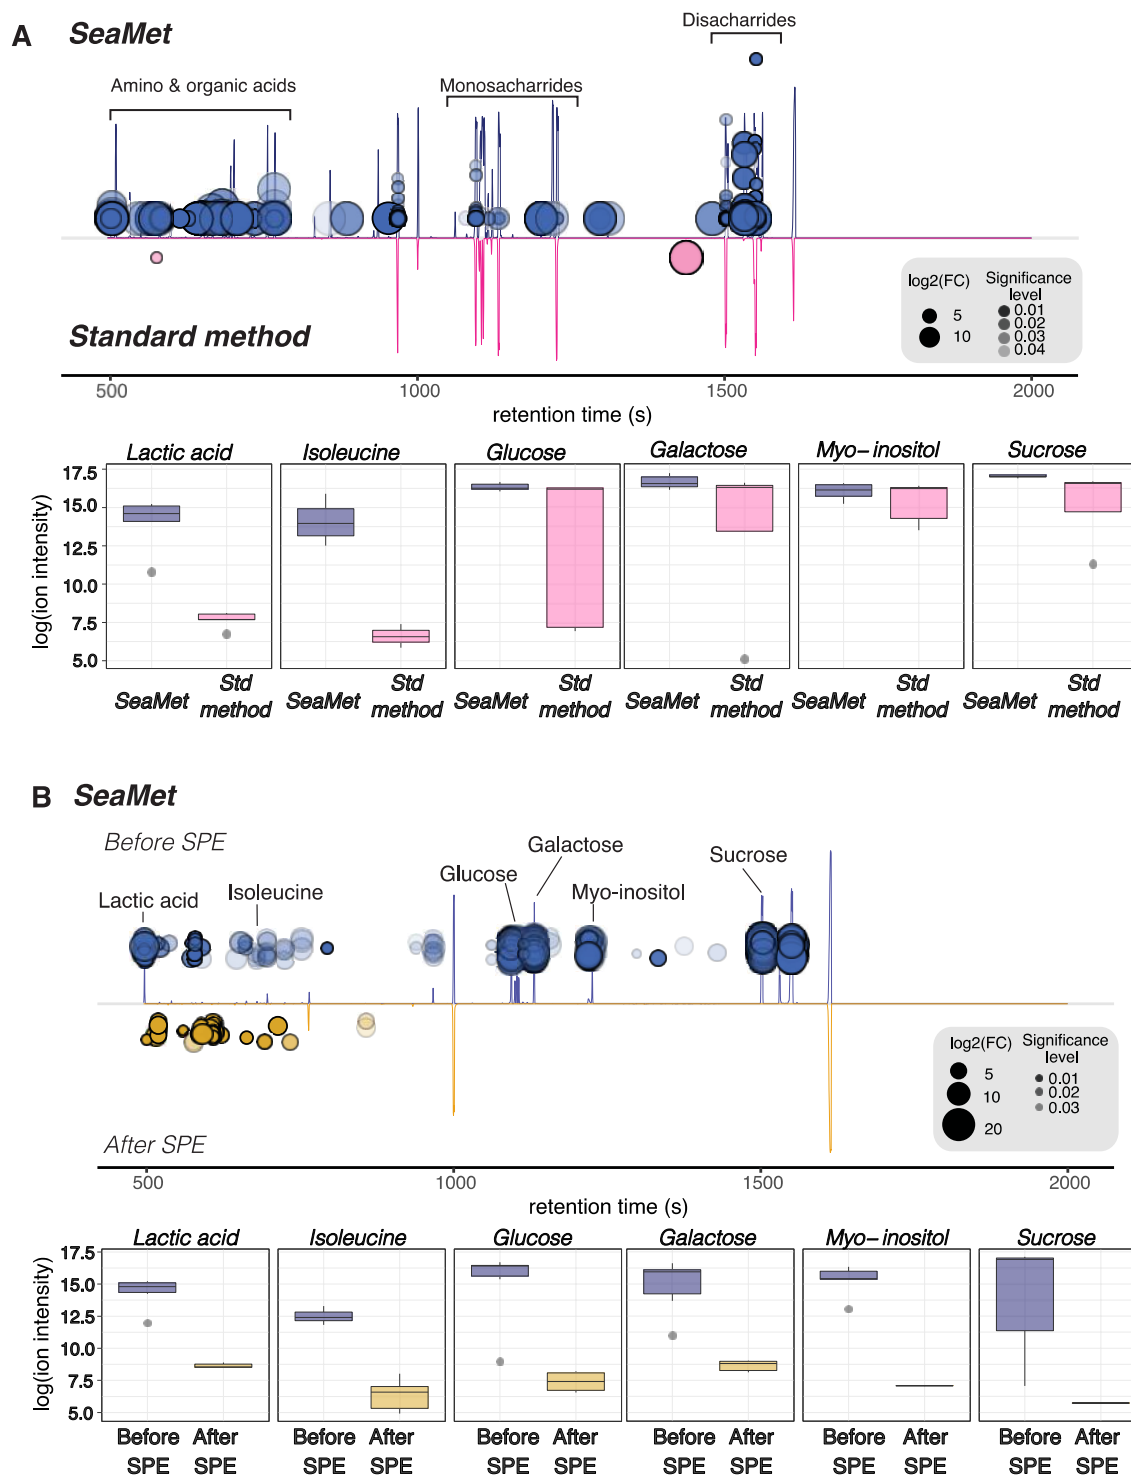

176  
177 **Figure 3. SeaMet enhances the detection of metabolites in marine samples. A, B** Total ion  
178 chromatogram cloud plots from GC-MS profiles of metabolite mixtures indicate significant differences  
179 (Benjamini-Hochberg adjusted  $p$ -value < 0.05) between ion abundances when comparing A, SeaMet

180 (blue; top) to the standard metabolite derivatization (pink; bottom) protocol for GC-MS samples and **B**,  
181 chromatograms using SeaMet on marine samples before (blue; top) and after (yellow; bottom) solid phase  
182 extraction (SPE). Individual compound box plots are also shown in **A** and **B** to highlight improvements in  
183 metabolite detection using SeaMet. For the cloud plots, larger bubbles indicate higher  $\log_2(\text{fold changes})$   
184 between groups and more intense colors represent lower t-test p-values when comparing individual  
185 feature ( $m/z$  ions) intensities. Samples prepared with SeaMet had high abundances of organic acids (lactic  
186 acid, succinic acid, and fumarate), amino acids (isoleucine, leucine, threonine and valine), sugar alcohols  
187 (myo-inositol and mannitol), and sugars (fructose, glucose, cellobiose, maltose, ribose, galactose, and  
188 sucrose) in comparison to SPE-based sample preparation. Representatives of each class are indicated in **B**.  
189 To show signal improvement using SeaMet, samples for both comparisons included authentic metabolite  
190 standards representing multiple chemical classes.

191

192 To demonstrate the power of SeaMet in characterizing the metabolism of marine bacteria,  
193 we monitored changes in the extracellular metabolome during growth of a heterotrophic  
194 Gammaproteobacterium, *Marinobacter adhaerens* that occurs in aggregation with diatoms  
195 throughout the North Sea. Using SeaMet, we simultaneously observed hundreds of metabolites  
196 and detected significant changes in the metabolite composition of marine culture medium during  
197 the bacteria's initial growth phase (adjusted  $p$ -value  $< 0.05$ ; **Fig. 4**; **Fig. S3**). The bacteria took  
198 up different carbon and nitrogen resources in a cascade-like fashion, and later in growth, began  
199 excretion of an undescribed compound (**Fig. 4C, D**; **Fig. S3**). By measuring multiple metabolite  
200 classes in a single analytical run, our results revealed that *M. adhaerens* preferentially took up  
201 amino acids over readily available sugar compounds (e.g., trehalose, **Fig. S3**). Previous  
202 proteomic results indicated that *M. adhaerens* had a high number of expressed amino acid uptake  
203 transporters (34). Our results expand on these findings by i) highlighting which amino acids the  
204 *M. adhaerens* prefers, ii) providing experimental evidence that this heterotroph does not take up  
205 sugars, despite the genomic ability to use them in their metabolism (35), and iii), showcasing  
206 that *M. adhaerens* participates in the successional uptake of resources. Successional dynamics in

207 substrate use is a common energy conservation mechanism in bacteria (36) and affects central  
208 carbon and nitrogen dynamics during growth. *M. adhaerens*, like many other bacteria,  
209 participates in the release of organic carbon, which can be metabolized by other microorganisms  
210 or will contribute to the complexity of refractory DOM.

211         Given that other exometabolomic methods for marine samples either miss major  
212 compound classes due to sample pre-treatment (e.g., SPE based sample preparation) or are  
213 targeted approaches that can only measure a few metabolite groups in a given run, it is likely  
214 these observations in *M. adhaerens* physiology would have been obscured. Give the ease in  
215 applying our method to culture studies, it is possible to integrate SeaMet with other “omics”  
216 approaches to help illuminate microbial physiology in the marine environment. By identifying  
217 and quantifying metabolites that are consumed and excreted in cultivable marine bacteria, our  
218 method expands our understanding of key primary compounds involved in the transformation of  
219 organic matter in the ocean.

220

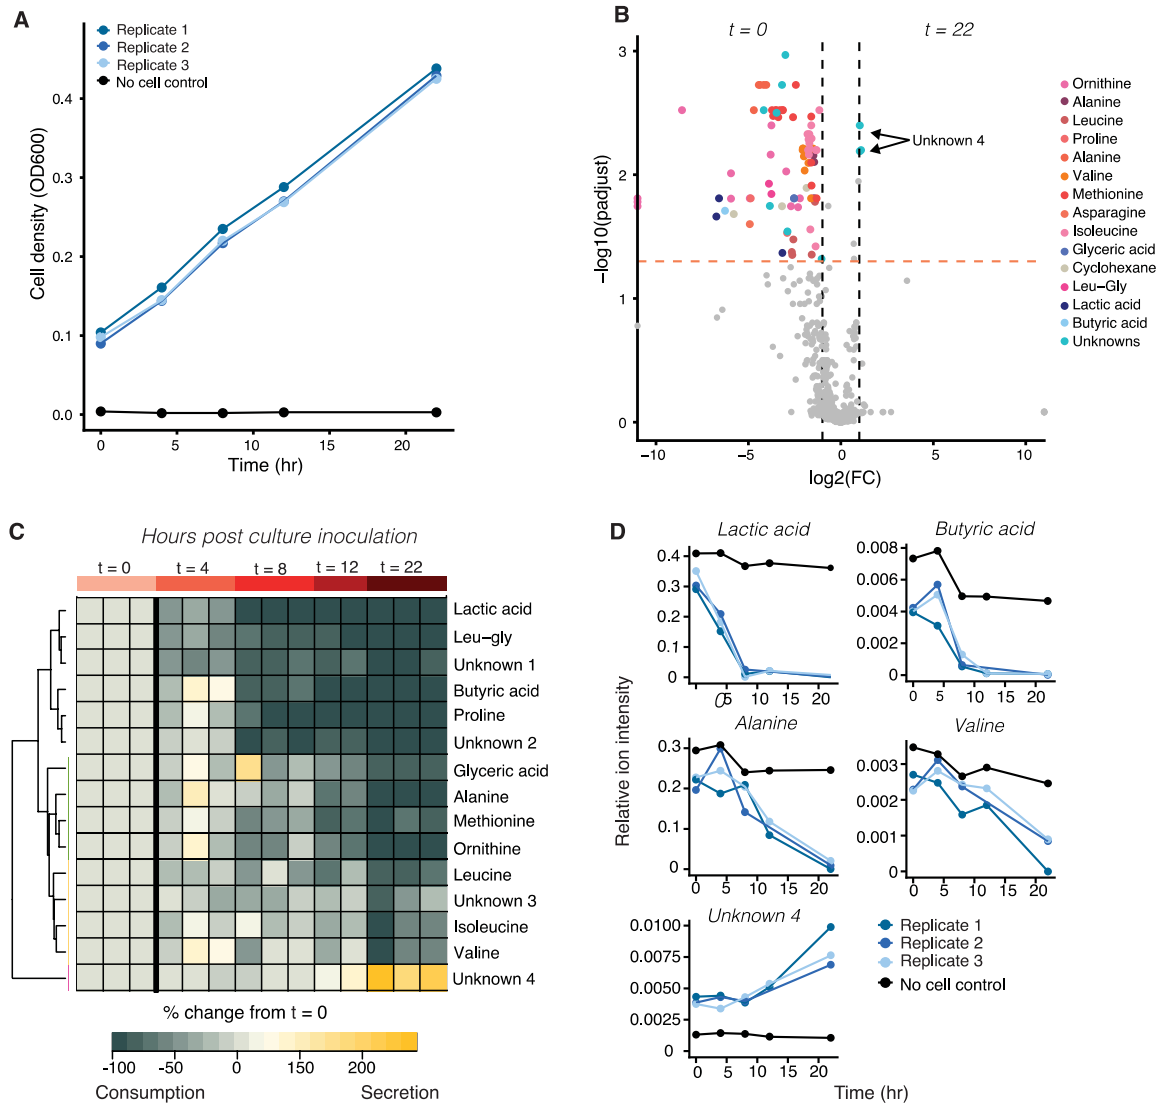

221  
 222 **Figure 4. Metabolite consumption and excretion during culture of the marine heterotroph**  
 223 *Marinobacter adhaerens*. **A**, Cell densities increased during the first 22 hours of culture growth in  
 224 Marine Broth. **B**, Volcano plot showing differences in ion abundances in cell growth media  
 225 between the initial and final (22 hour) sampling time points. Variables exhibiting high fold  
 226 change values ( $\log_2(\text{fold change}) > 2$ ) and significant differences ( $p\text{-adjusted} < 0.05$ ) between  
 227 the two sampling time points are colored according to their metabolite database (NIST)  
 228 annotation. **C**, A heatmap of metabolite abundances after 22 h relative to starting conditions indicates  
 229 some compounds, like the dipeptide leucine-glycine (leu-gly), and lactic acid were taken up before others,  
 230 such as branch chain amino acids. After 12–22 hours of growth, the bacteria excreted an unknown

231 compound (Unknown 4). Hierarchical clustering shows groups of metabolites that changed significantly  
232 during growth (left hand colored bars, B.H. adjusted p-value < 0.05; fold change > 2). These metabolite  
233 groups represent successive stages in *M. adhaerens* consumption and production of marine broth  
234 components. **D**, Relative ion abundances over time for select metabolites from each cluster group shown  
235 in **C**. The blue lines represent biological replicate cultures while the black line shows results from a  
236 control sample with no cell addition. Low variation among biological replicates highlights the  
237 reproducibility of SeaMet.

238

239 To test the ability of our workflow to assess complex environmental metabolomes, we  
240 applied SeaMet to porewater samples from coralline and mangrove sediments. Coral reefs and  
241 mangroves, two globally important coastal ecosystems, contain many biological compounds that  
242 remain undescribed. It is essential to characterize the metabolome of these habitats to understand  
243 the role of these ecosystems in biogeochemical cycling.

244 Our approach detected 295 and 428 metabolite peaks from coralline and mangrove  
245 porewater profiles (**Fig. 5**), including sugars, amino acids, organic acids, fatty acids, and  
246 background signals. Diverse and abundant sugars from sediment porewaters adjacent to corals,  
247 as well as fatty acids from porewaters next to mangroves drove the observed significant  
248 differences between habitats (ADONIS  $p$ -value < 0.001,  $R^2 = 0.514$ ; **Fig. 5 and Table S5**).

249 Given that corals and mangroves thrive in oligotrophic waters and their associated  
250 sediments harbor diverse, abundant and metabolically active microorganisms (37, 38), we were  
251 surprised to measure high levels of metabolites that are typically consumed in primary  
252 metabolism. Metabolomic analyses of marine sediments (in bulk) have also detected high  
253 abundances of primary metabolites (39, 40), suggesting sediment habitats – which are globally  
254 home to an estimated  $2.9 \times 10^{29}$  microbial cells (41) – contain many different types of  
255 metabolites that drive microbial community metabolism. These data call for a reexamination of

256 carbon sequestration in coastal sediments using techniques that can identify and quantify the  
257 accumulation of liable metabolites.

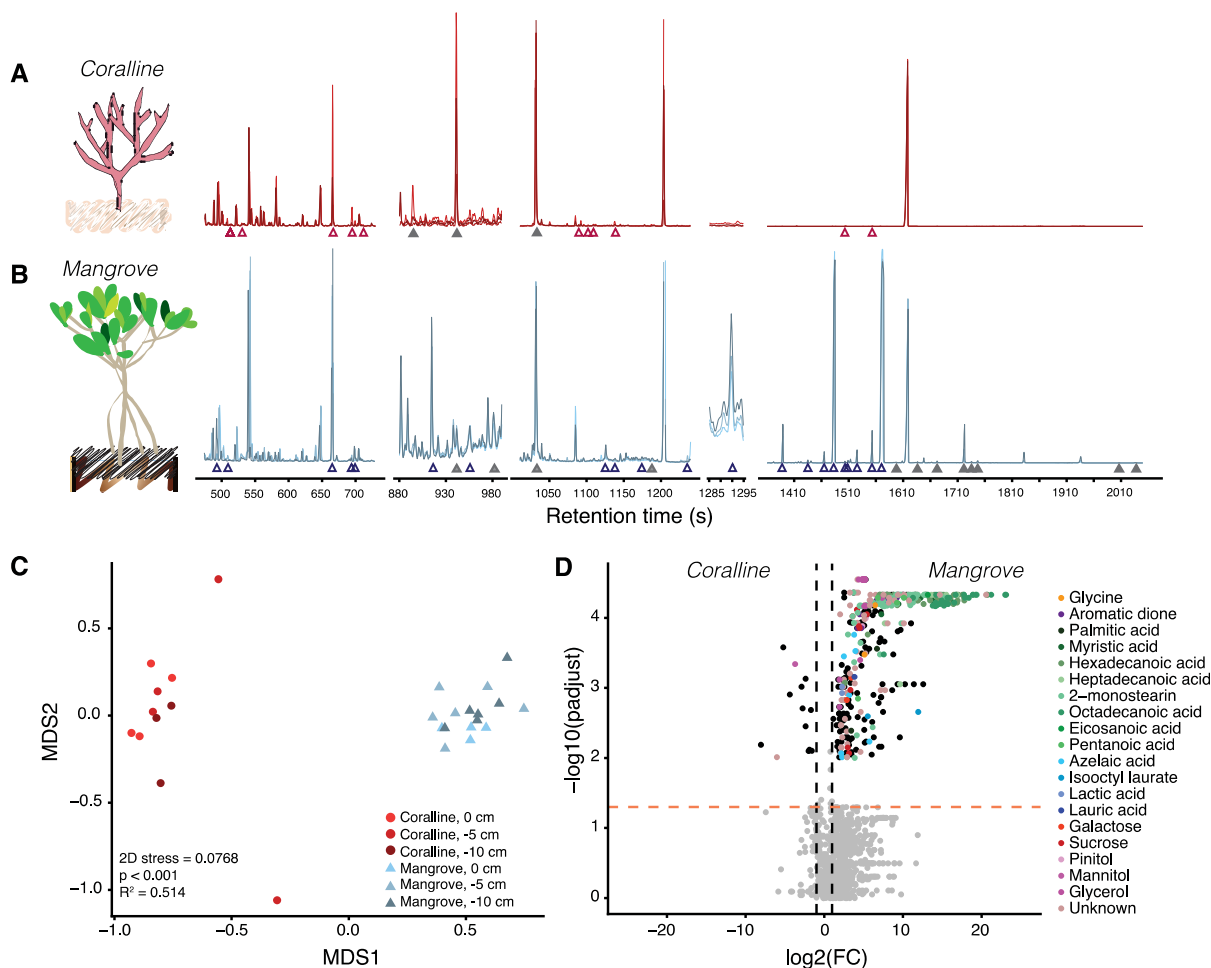

258  
259 **Figure 5. Metabolite profiles from marine habitats acquired with SeaMet.** GC-MS metabolomic  
260 profiles from **A**, coralline and **B**, mangrove sediment porewaters showed high concentrations of identified  
261 metabolites (open triangles), e.g. fatty acids and sugars that explain multivariate differences in  
262 composition in **C**. Profiles also revealed unknown peaks (filled triangles) for which no matches were  
263 found in public databases (**Table S5**). **C**, Bray-Curtis informed non-metric multidimensional scaling  
264 analysis of sediment porewater metabolomic profiles from coralline (red) and mangrove (blue)  
265 habitats across sediment depths. ADONIS p-value and R<sup>2</sup> showed a significant correlation  
266 between sampling location and metabolite composition. **D**, Volcano plot showing differences in  
267 ion abundances between habitats. Significant ions (*p*-adjusted < 0.05) with log<sub>2</sub>-fold change > 2  
268 are shaded according to their metabolite database (NIST) annotation.  
269



270           Due to the technical difficulties of detecting metabolites in seawater, a large portion of  
271 ocean chemistry remains unannotated, reflecting one of the central challenges in metabolomics  
272 research (42). By providing a new method to measure a broad scope of the marine metabolome,  
273 we offer an avenue to identify molecules from marine environments and expand existing mass  
274 spectrometry databases that aim to characterize chemical space across ecosystems. As an  
275 example, our samples from sediment porewaters of mangroves and coral reefs revealed 11  
276 metabolites driving variation between habitats that did not match public database entries (Fig. S6  
277 and **Table S5**) (43, 44).

278

## 279 **Conclusions**

280           SeaMet is a marine metabolomics workflow that enables the analysis of primary  
281 metabolism in the oceans. It is time efficient, allows the detection of diverse metabolite classes  
282 in a single run, and expands the analytical window for molecules that can be detected within  
283 marine samples. This advance enables untargeted metabolomics for marine ecosystems using a  
284 low-cost, easy to use GC-MS platform. Moreover, SeaMet is independent of MS  
285 instrumentation, allowing it to be combined with time-of-flight or Orbitrap MS detectors to  
286 provide faster analysis time and higher mass resolving power to improve metabolite  
287 identification. We expect our marine metabolomics workflow will enable the exploratory  
288 analysis of metabolites occurring in seawater and thereby advance our understanding of the  
289 ocean's vast and largely unexplored metabolome.

290

291

292

## 293 **Materials and Methods**

294 **Data availability.** All metabolite profile data will be made publicly available at Metabolights  
295 (<https://www.ebi.ac.uk/metabolights/>) under identification numbers MTBLS826, MTBLS839,  
296 MTBLS843, MTBLS844, MTBLS848, and MTBLS849 (currently IN REVIEW) or by contact  
297 with the authors. Reviewer links:

298 <https://www.ebi.ac.uk/metabolights/reviewer5eb6b480436b019d9f1351a828ee7c3d>

299 <https://www.ebi.ac.uk/metabolights/reviewerd923ea1c3a53d000b97ccf383991032d>

300 <https://www.ebi.ac.uk/metabolights/reviewer9be9cf4-9a7d-4fff-98d5-c3d574c3b7f5>

301 <https://www.ebi.ac.uk/metabolights/reviewer08ce2d89-3945-45be-8a9b-4ea872fc86bf>

302 <https://www.ebi.ac.uk/metabolights/reviewer07a4ce73-1e8e-46aa-80c8-0c2f26411174>

303 <https://www.ebi.ac.uk/metabolights/reviewer2878413e6f8a6a883b27bdee8c1bbba6>

304

305 **Reagents and experimental sample preparation.** The derivatization chemicals, trimethylsilyl-  
306 N-methyl trifluoroacetamide (MSTFA) and N,O-Bis(trimethylsilyl)trifluoroacetamide (BSTFA)  
307 were obtained from CS-Chromatographie Service and pyridine from Sigma-Aldrich at >99.98%  
308 purity. Methoxyamine hydrochloride (MeOX; Sigma-Aldrich) aliquots were further dried at  
309 60 °C in a drying oven for 1 h to remove residual moisture. Artificial seawater (ASW) was  
310 prepared within the range of natural salinity (36‰) by dissolving (per L of water) 26.37 g  
311 sodium chloride, 6.8 g magnesium sulfate heptahydrate, 5.67 g magnesium chloride hexahydrate,  
312 1.47 g calcium chloride, 0.6 g potassium chloride, and 0.09 g potassium bromide. Following  
313 autoclave sterilization, pH was adjusted to 7.7 using sodium hydroxide. 1 mL of the following  
314 supplements and solutions were added: 150 mM monopotassium phosphate, 500 mM ammonium  
315 chloride pH 7.5, trace element solution, selenite-tungstate solution, vitamin solution, thiamine

316 solution, B12 solution and 0.21 g sodium bicarbonate (45). Ultra-pure water (MQ) was prepared  
317 by purifying deionized water with an Astacus membraPure system (Astacus membraPure, 18.3  
318  $\text{m}\Omega \times \text{cm}$  25 °C).

319 Metabolite standards were obtained from commercial sources (**Table S4**) and combined  
320 into mixtures in which each compound had a final concentration of 0.4 mM. Metabolite mixtures  
321 were prepared to (a) test the effect of salt and water on metabolite detection, (b) develop SeaMet,  
322 our marine metabolomics workflow, (c) compare metabolite detection before and after solid  
323 phase extraction (SPE) based sample preparation, and (d) to quantify the detection limits of  
324 specific compound classes (**Table S6**). Finally, multiple mixtures were prepared to document the  
325 retention times of 107 standards dissolved in ASW using SeaMet (**Table S4**). Sample aliquots  
326 for the above mentioned experiments were prepared by drying down 200  $\mu\text{L}$  of the mixture in a  
327 speed vacuum concentrator (Eppendorf Concentrator Plus<sup>(R)</sup>, 2.5 h, 45°C, V-AQ) for all  
328 experiments except SPE comparison and quantification of detection limits. For the SPE  
329 comparison experiment, 400  $\mu\text{L}$  of the mix were dried down. For the quantification of metabolite  
330 classes, a serial dilution of the mix was prepared to obtain concentrations between 0.5 nmol and  
331 80 nmol of each compound. All dried mixture samples were stored at 4 °C.

332  
333 **SeaMet metabolite derivatization.** To prepare marine samples for gas chromatography-mass  
334 spectrometry (GC-MS) analysis, 0.5 to 1 mL of a saltwater sample or experimental mixture  
335 dissolved in ASW was dried in a speed vacuum concentrator for 8 hours (Eppendorf  
336 Concentrator Plus<sup>(R)</sup>, 45°C, V-AQ). To further remove residual water locked within the salt  
337 pellet, 250  $\mu\text{L}$  of toluene (99.8%, < 0.2 % water) was added to each sample and the mixture was  
338 ultrasonicated for 10 min at maximum intensity. The toluene was subsequently removed under a

339 gentle flow of N<sub>2</sub> gas. Metabolite derivatization was performed by adding 80 µL of MeOX  
340 dissolved in pyridine (20 mg × mL<sup>-1</sup>) to the dried pellet. The mixture was ultrasonicated (EMag  
341 Emmi-12HC®) for 10 min at maximum intensity, briefly vortexed to dissolve the pellet into  
342 solution, and subsequently incubated for 90 min at 37 °C using a thermal rotating incubator  
343 under constant rotation at 1350 rpm. The pyridine was removed from the sample at room  
344 temperature under a gentle flow of N<sub>2</sub> gas (approximately 1 hour). Following the addition of 100  
345 µL of BSTFA, the mixture was ultrasonicated for 10 min at maximum intensity, vortexed, and  
346 incubated for 30 min at 37 °C using a thermal rotating incubator under constant rotation at 1350  
347 rpm. The derivatized mixture was ultrasonicated for 10 min at maximum intensity. Remaining  
348 salt in each sample was pelleted through centrifugation at 21.1 g for 2 min at 4 °C. 100 µL was  
349 transferred to a GC-MS vial for analysis. The full proposed method is publicly available at  
350 [dx.doi.org/10.17504/protocols.io.nyxdfxn](https://doi.org/10.17504/protocols.io.nyxdfxn).

351  
352 **GC-MS data acquisition.** All derivatized samples were analyzed on an Agilent 7890B GC  
353 coupled to an Agilent 5977A single quadrupole mass selective detector. Using an Agilent 7693  
354 autosampler, 1 µL was injected in splitless mode through a GC inlet liner (ultra inert, splitless,  
355 single taper, glass wool, Agilent) onto a DB-5MS column (30 m × 0.25 mm, film thickness 0.25  
356 µm; including 10 m DuraGuard column, Agilent). The inlet liner was changed every 50 samples  
357 to avoid damage to the GC column and associated shifts in retention times. The injector  
358 temperature was set at 290 °C. Chromatography was achieved with an initial column oven  
359 temperature set at 60 °C followed by a ramp of 20 °C min<sup>-1</sup> until 325 °C, then held for 2 mins.  
360 Helium carrier gas was used at a constant flow rate of 1 mL min<sup>-1</sup>. Mass spectra were acquired in  
361 electron ionization mode at 70 eV across the mass range of 50–600 m/z and a scan rate of 2

362 scans  $s^{-1}$ . The retention time for the method locked using standard mixture of fatty acid methyl  
363 esters (Sigma Aldrich).

364

365 **Data processing and analysis.** Raw Agilent data files were converted to mzXML files using  
366 Msconvert (46) and imported into XCMS (v. 2.99.6)(47) within the R software environment (v.  
367 3.4.2) for data processing and analysis. Total ion chromatograms (TIC) were obtained using the  
368 xcmsRaw function. TICs comparing sample preparation steps were expressed as a percentage of  
369 the MQ control. For environmental and cell culture GC-MS profiles, peaks were picked using the  
370 matchedFilter algorithm in XCMS with a full width at half maximum set to 8.4, signal to noise  
371 threshold at 1,  $m/z$  width of 0.25 (step parameter), and  $m/z$  difference between overlapping peaks  
372 at 1 (**Supplemental Text 1**). Resulting peaks were grouped, retention times corrected and  
373 regrouped using the density (bandwidth parameter set to 2) and obiwarp methods. Following  
374 peak filling, the CAMERA (v.1.32.0)(48) package was used to place  $m/z$  peaks into pseudo-  
375 spectra by grouping similar peaks with the groupFWHM function. Masses below 150  $m/z$  were  
376 removed from the resulting peak table and all profiles were normalized to the ribitol internal  
377 standard. Peaks occurring in run blanks and those with higher relative standard deviation scores  
378 (% RSD > 25) in quality control samples (cell culture experiment only) were removed from the  
379 dataset. To determine differences in metabolite abundances between sediment habitats,  
380 metabolite peak data were analyzed using a Bray-Curtis informed non-metric multidimensional  
381 scaling analysis followed by an analysis of variance using distance matrices (ADONIS) to test if  
382 there are significant differences in metabolite composition between sites. To identify individual  
383 peaks that differed significantly between sediment habitats and between cell culture sampling  
384 time points, resulting peaks tables were also log transformed and compared using a one-way

385 analysis of variance. All p-values were adjusted using the Benjamini-Hochberg (B.H.) method to  
386 control for false positives (49). Significant variables exhibiting large fold-change differences  
387 between starting and ending conditions were further investigated. CAMERA grouped peaks from  
388 the environmental survey, and those important to shifts in the cell culture experiment were  
389 identified using AMDIS (50). Peaks with NIST hits below 800 were compared to the online data  
390 repositories, BinVestigate (44) and Golm (43) using the calculated Kovats retention indices (51)  
391 based on a reference n-alkane standard (C7-C40 Saturated Alkanes Standards, Sigma-Aldrich). If  
392 no hit was provided, these were considered unknowns.

393

394 **The effect of salt and water on metabolite detection.** To test the effect of salt on metabolite  
395 derivatization, metabolite mix aliquots were resuspended in 1 mL of ASW ranging in salinity  
396 from 0 to 34‰ and dried as described above. Methoxamine-trimethylsilylation (TMS) two step  
397 derivatization was performed by resuspending each sample in 80  $\mu$ L of MeOX in pyridine (20  
398  $\text{mg mL}^{-1}$ ) and incubating for 90 min at 37 °C using a thermal rotating incubator under constant  
399 rotation at 1350 rpm. MSTFA was subsequently added to the mixture, and the mixture incubated  
400 under the same conditions for 90 min (29). Derivatized samples were centrifuged to pellet salt  
401 and the supernatant was transferred to a GC-MS vial for analysis. To test the independent effect  
402 of water on metabolite derivatization reactions, MQ was added to dried mixture aliquots in steps  
403 of 1  $\mu$ L from 0 to 10  $\mu$ L. Replicate water gradient samples were subsequently derivatized as  
404 before using MeOX and MSTFA or by replacing the MSTFA reagent with BSTFA.

405

406 **Marine metabolomics method development.** To show how each method development step  
407 increased signal intensity and reduced variation in metabolite detection, replicate mixture

408 aliquots ( $n = 5$ ) were resuspended in 0.5 mL of ASW. Mixture aliquots ( $n = 5$ ) were also  
409 resuspended in MQ as a no-salt control to highlight the effects of saltwater on metabolite  
410 derivatization. 40  $\mu$ L ribitol (0.2 mM) and 100  $\mu$ L cholestane (1 mM) were added to each aliquot  
411 as internal standards. MQ and ASW samples were first derivatized following the (i) two-step  
412 methoxamine-trimethylsilylation (TMS) previously described. Successive steps in the proposed  
413 protocol were then applied to ASW samples to demonstrate the combined effects on metabolite  
414 detection: (ii) exchange of MSTFA for BSTFA, (iii) removal of residual water from the salt  
415 pellet by increasing the speed vacuum drying time and by introducing a toluene drying step to  
416 help extract water from the salt pellet, (iv) ultrasonication of the samples after the steps involving  
417 addition of toluene, MeOX, BSTFA and following the last derivatization step, and (v) drying the  
418 MeOX in pyridine reagent between derivatization reactions. Resulting GC-MS profiles were  
419 used to show increases in total signals detected with successive changes in the proposed  
420 protocol. Additionally, a cloud plot (using processed peak integration data) was generated to  
421 compare compounds dissolved in seawater and to show which metabolite ions exhibited  
422 significant (B.H. adjusted  $p < 0.05$ ) and large fold changes ( $\log_2(\text{FC}) > 2$ ) between the standard  
423 and the SeaMet method.

424

425 **Solid phase extraction.** Replicate metabolite mix aliquots ( $n = 6$ ) were resuspended in 2 mL of  
426 artificial seawater. 0.5 mL was reserved from each sample to compare GC-MS profiles before  
427 and after SPE sample concentration. Inorganic salts were eluted and metabolites extracted from  
428 the remaining 1.5 mL mixture following a SPE based technique using Bond Elut styrene-  
429 divinylbenzene (PPL) columns (17). The internal standards ribitol and cholestane were added to  
430 both, the reserved sample (before SPE) and the resulting SPE-concentrated sample (after SPE).

431 All samples were prepared for GC-MS analysis following the proposed marine metabolomics  
432 method. Resulting profiles were compared using a cloud plot to show which metabolite ions  
433 exhibited significant (B.H. adjusted  $p < 0.05$ ) and large fold changes ( $\log_2(\text{FC}) > 2$ ) between the  
434 pre- and post- SPE treatments.

435

436 **Environmental sampling.** Replicate porewater profiles were collected from coralline ( $n = 4$ )  
437 and mangrove ( $n = 6$ ) sediments from Carrie Bow Cay (N 16° 04' 59", W 88° 04' 55") and Twin  
438 Cayes, Belize (N 16° 50' 3", W 88° 6' 23") using a 1 m steel lance with a 2  $\mu\text{m}$  inner diameter  
439 covered by 0.063 mm steel mesh. Samples (2 mL water) were collected every 5 cm from the  
440 sediment surface to 15 cm depth. Samples were immediately frozen at -20 °C until further  
441 analysis. Directly before preparation for GC-MS, the internal standards ribitol and cholestane  
442 were added to 0.5 mL of each environmental sample. The mixture was subsequently prepared for  
443 GC-MS analysis using the SeaMet method described above.

444

445 **Cell culture sampling.** Replicate cultures ( $n = 3$ ) of *Marinobacter adhaerens* HP15 DsRed were  
446 cultivated in Marine Broth media at 18 °C and 240 rpm as previously described (34). Media  
447 samples from the cell cultures and a no-bacteria control media were collected at 0, 4, 8, 12, and  
448 22 h post culture inoculation. Cell counts were monitored at each time point by measuring the  
449 optical density at 600 nm ( $\text{OD}_{600}$ ). Sampling was carried out by collecting 2 mL of each culture  
450 and pelleting the cells through centrifugation for 10 min, at 21.1 g and 4 °C. The supernatant was  
451 immediately stored at -20 °C until preparation for GC-MS analysis. Prior to sample  
452 derivatization using SeaMet, ribitol (0.2 mM; 40  $\mu\text{L}$ ) and cholestane (100 mM; 100  $\mu\text{L}$ ) were  
453 added to 0.5 mL of each experimental sample and subsequently dried down in a speed vacuum



454 concentrator (8 hr, 45 °C, VA-Q). To control for technical variation, quality control (QC)  
455 samples ( $n = 3$ ) were prepared by combining 0.25  $\mu$ L of each culture supernatant and an  
456 extraction blank generated by drying down 0.5 mL of MQ.

457

## 458 **Supporting information**

459 Supporting information includes supporting tables, figures, references and XCMS peak picking  
460 script.

461

## 462 **Acknowledgements**

463 We thank T. Gulstad, K. Caspersen, F. Fojt, and M. Meyer (MPI-Bremen) for support with data  
464 acquisition and sample preparation, N. Böttcher (Jacobs University Bremen) for providing  
465 culture samples, D. Michellod for sediment pore water sample collection, and B. Geier and J.  
466 Beckmann (MPI-Bremen) for valuable discussions. We acknowledge the Max-Planck Society  
467 and the Gordon and Betty Moore Foundation (Marine Microbial Initiative Investigator Award to  
468 ND, Grant #GBMF3811) for financial support. This work is contribution \*XXX\* from the  
469 Carrie Bow Cay Laboratory, Caribbean Coral Reef Ecosystem Program, National Museum of  
470 Natural History, Washington DC.

471

## 472 **References**

- 473 1. Moran MA, *et al.* (2016) Deciphering ocean carbon in a changing world. *Proc Natl Acad Sci U S*  
474 *A* 113(12):3143-3151.  
475  
476 2. Lechtenfeld OJ, Hertkorn N, Shen Y, Witt M, & Benner R (2015) Marine sequestration of carbon  
477 in bacteria metabolites. *Nat Comm* 6:6711.  
478  
479 3. Sabine CL, *et al.* (2004) The oceanic sink for anthropogenic CO<sub>2</sub>. *Science* 305:367-371.  
480  
481 4. Sunagawa S, *et al.* (2015) Structure and function of the global ocean microbiome. *Science*  
482 384(6237).

- 483  
484 5. Kell DB, *et al.* (2005) Metabolic footprinting and systems biology: the medium is the message.  
485 *Nat Rev Microbiol* 3(7):557-565.  
486  
487 6. Swenson TL, Jenkins S, Bowen BP, & Northen TR (2015) Untargeted soil metabolomics  
488 methods for analysis of extractable organic matter. *Soil Biol and Biochem* 80:189-198.  
489  
490 7. Swenson TL, Karaoz U, Swenson JM, Bowen BP, & Northen TR (2018) Linking soil biology and  
491 chemistry in biological soil crust using isolate exometabolomics. *Nat Commun* 9(1):19.  
492  
493 8. Allen J, *et al.* (2003) High-throughput classification of yeast mutants for functional genomics  
494 using metabolic footprinting. *Nat Biotech* 21(6):692-696.  
495  
496 9. Paczia N, *et al.* (2012) Extensive exometabolome analysis reveals extended overflow metabolism  
497 in various microorganisms. *Microbe Cell Fact* 11(22).  
498  
499 10. Ternon E, *et al.* (2016) Spherulization as a process for the exudation of chemical cues by the  
500 encrusting sponge *C. crambe*. *Sci Rep* 6:29474.  
501  
502 11. Kuhlisch C & Pohnert G (2015) Metabolomics in chemical ecology. *Nat Prod Rep* 32(7):937-  
503 955.  
504  
505 12. May MA, Bishop KD, & Rawson PD (2017) NMR profiling of metabolites in larval and juvenile  
506 blue mussels (*Mytilus edulis*) under ambient and low salinity conditions. *Metabolites* 7(3).  
507  
508 13. Sogin EM, Putnam HM, Nelson CE, Anderson P, & Gates RD (2017) Correspondence of coral  
509 holobiont metabolome with symbiotic bacteria, archaea and Symbiodinium communities. *Environ*  
510 *Microbiol Rep* 9(3):310-315.  
511  
512 14. Goullitquer S, Potin P, & Tonon T (2012) Mass spectrometry-based metabolomics to elucidate  
513 functions in marine organisms and ecosystems. *Mar Drugs* 10(4):849-880.  
514  
515 15. Selander E, *et al.* (2016) Solid phase extraction and metabolic profiling of exudates from living  
516 copepods. *PeerJ* 4.  
517  
518 16. Wienhausen G, Noriega-Ortega BE, Niggemann J, Dittmar T, & Simon M (2017) The  
519 exometabolome of two model strains of the roseobacter group: a marketplace of microbial  
520 metabolites. *Front Microbiol* 8:1985.  
521  
522 17. Dittmar T, Koch B, Hertkorn N, & Kattner G (2008) A simple and efficient method for the solid-  
523 phase extraction of dissolved organic matter (SPE-DOM) from seawater. *Limnol Oceanogr*  
524 6:230-235.  
525  
526 18. Amin SA, *et al.* (2015) Interaction and signalling between a cosmopolitan phytoplankton and  
527 associated bacteria. *Nature* 522(7554):98-101.  
528  
529 19. Sanudo-Wilhelmy SA, *et al.* (2012) Multiple B-vitamin depletion in large areas of the coastal  
530 ocean. *Proc Natl Acad Sci U S A* 109(35):14041-14045.  
531

- 532 20. Koch BP, Ludwighowski K-U, Kattner G, Dittmar T, & Witt M (2008) Advanced  
533 characterization of marine dissolved organic matter by combining reversed-phase liquid  
534 chromatography and FT-ICR-MS. *Mar Chem* 111(3-4):233-241.  
535
- 536 21. Petras D, *et al.* (2017) High-Resolution Liquid Chromatography Tandem Mass Spectrometry  
537 enables large scale molecular characterization of dissolved organic matter. *Front Mar Sci* 4.  
538 DOI:[10.3389/fmars.2017.00405](https://doi.org/10.3389/fmars.2017.00405)  
539
- 540 22. Jiao N, *et al.* (2010) Microbial production of recalcitrant dissolved organic matter: long-term  
541 carbon storage in the global ocean. *Nat Rev Microbiol* 8(8):593-599.  
542
- 543 23. A J, *et al.* (2005) Extraction and GC/MS analysis of the human blood plasma metabolome. *Anal*  
544 *Chem* 77(24):8086-8094.  
545
- 546 24. Fiehn O, *et al.* (2000) Metabolite profiling for plant functional genomics. *Nat Biotechnol*  
547 18:1157-1161.  
548
- 549 25. Theriot CM, *et al.* (2014) Antibiotic-induced shifts in the mouse gut microbiome and metabolome  
550 increase susceptibility to *Clostridium difficile* infection. *Nat Commun* 5:3114.  
551
- 552 26. Bruce TJ, *et al.* (2008) cis-Jasmone induces *Arabidopsis* genes that affect the chemical ecology of  
553 multitrophic interactions with aphids and their parasitoids. *Proc Natl Acad Sci U S A*  
554 105(12):4553-4558.  
555
- 556 27. Fischer E & Sauer U (2003) Metabolic flux profiling of *Escherichia coli* mutants in central  
557 carbon metabolism using GC-MS. *Euro J Biochem* 270(5):880-891.  
558
- 559 28. Villas-Boas SG, Noel S, Lane GA, Attwood G, & Cookson A (2006) Extracellular metabolomics:  
560 a metabolic footprinting approach to assess fiber degradation in complex media. *Anal Biochem*  
561 349(2):297-305.  
562
- 563 29. Roessner U, Wagner C, Kopka J, Trethewey RN, & Willmitzer L (2000) Simultaneous analysis  
564 of metabolites in potato tuber by gas chromatography-mass spectrometry. *Plant J* 23(1):131-142.  
565
- 566 30. Chan EC, Pasikanti KK, & Nicholson JK (2011) Global urinary metabolic profiling procedures  
567 using gas chromatography-mass spectrometry. *Nat Protoc* 6(10):1483-1499.  
568
- 569 31. Kind T, *et al.* (2009) FiehnLib: mass spectral and retention index libraries for metabolomics  
570 based on quadrupole and time-of-flight gas chromatography/mass spectrometry. *Anal Chem*  
571 81:10038-10048.  
572
- 573 32. Liebeke M & Puskas E (2019) Drying enhances signal intensity for global GC-MS metabolomics.  
574 *Metabolites* 9(4).  
575
- 576 33. Johnson WM, Kido Soule MC, & Kujawinski EB (2017) Extraction efficiency and quantification  
577 of dissolved metabolites in targeted marine metabolomics. *Limnol Oceanogr* 15(4):417-428.  
578
- 579 34. Stahl A & Ullrich MS (2016) Proteomics analysis of the response of the marine bacterium  
580 *Marinobacter adhaerens* HP15 to the diatom *Thalassiosira weissflogii*. *Aquat Microb Ecol*  
581 78(2):65-79.  
582

- 583 35. Gardes A, *et al.* (2010) Complete genome sequence of *Marinobacter adhaerens* type strain  
584 (HP15), a diatom-interacting marine microorganism. *Stand Genomic Sci* 3(2):97-107.  
585
- 586 36. Behrends V, Ebbels TM, Williams HD, & Bundy JG (2009) Time-resolved metabolic  
587 footprinting for nonlinear modeling of bacterial substrate utilization. *Appl Environ Microbiol*  
588 75(8):2453-2463.  
589
- 590 37. Ian H & Jed AF (2006) Spatial and vertical biogeography of coral reef sediment bacterial and  
591 diazotroph communities. *MEPS* 306:79-86.  
592
- 593 38. Andreote FD, *et al.* (2012) The microbiome of Brazilian mangrove sediments as revealed by  
594 metagenomics. *PLoS One* 7(6):e38600.  
595
- 596 39. Beale DJ, *et al.* (2018) Seasonal metabolic analysis of marine sediments collected from Moreton  
597 Bay in South East Queensland, Australia, using a multi-omics-based approach. *Sci Total Environ*  
598 631-632:1328-1341.  
599
- 600 40. Kimes NE, *et al.* (2013) Metagenomic analysis and metabolite profiling of deep-sea sediments  
601 from the Gulf of Mexico following the Deepwater Horizon oil spill. *Front Microbiol* 4:50.  
602
- 603 41. Kallmeyer J, Pockalny R, Adhikari RR, Smith DC, & D'Hondt S (2012) Global distribution of  
604 microbial abundance and biomass in subseafloor sediment. *Proc Natl Acad Sci U S A*  
605 109(40):16213-16216.  
606
- 607 42. Luzzatto-Knaan T, *et al.* (2017) Digitizing mass spectrometry data to explore the chemical  
608 diversity and distribution of marine cyanobacteria and algae. *Elife* 6. DOI:[10.7554/eLife.24214](https://doi.org/10.7554/eLife.24214)  
609
- 610 43. Kopka J, *et al.* (2005) GMD@CSB.DB: the Golm metabolome database. *Bioinformatics*  
611 21(8):1635-1638.  
612
- 613 44. Lai Z, *et al.* (2018) identifying metabolites by integrating metabolome databases with mass  
614 spectrometry cheminformatics. *Nat Methods* 15(1):53-56.  
615
- 616 45. Widdel F & Bak F (1992) Gram-Negative Mesophilic Sulfate-Reducing Bacteria. *The*  
617 *Prokaryotes: A Handbook on the Biology of Bacteria: Ecophysiology, Isolation, Identification,*  
618 *Applications*, eds Balows A, Trüper HG, Dworkin M, Harder W, & Schleifer KH (Springer, New  
619 York, NY).  
620
- 621 46. Holman JD, Tabb DL, & Mallick P (2014) Employing ProteoWizard to Convert Raw Mass  
622 Spectrometry Data. *Curr Protoc Bioinformatics* 46:13 24 11-19.  
623
- 624 47. Smith CA, Want EJ, O'Maille G, Abagyan R, & Siuzdak G (2006) XCMS: Processing mass  
625 spectrometry data for metabolite profiling using nonlinear peak alignment, matching, and  
626 identification. *Anal Chem* 78 (3): 779-787.  
627
- 628 48. Kuhl C, Tautenhahn R, Bottcher C, Larson TR, & Neumann S (2012) CAMERA: an integrated  
629 strategy for compound spectra extraction and annotation of liquid chromatography/mass  
630 spectrometry data sets. *Anal Chem* 84(1):283-289.  
631
- 632 49. Benjamini Y & Hochberg Y (1995) Controlling the false discovery rate: A practical and powerful  
633 approach to multiple testing. *J R Stat Soc Series B* 57(1):289-300.

- 634  
635 50. Stein SE (1999) An integrated method for spectrum extraction and cCompound identification  
636 from gas chromatography/mass spectrometry data. *JASMS* 10:770-781.  
637  
638 51. Kovats E (1958) Gas-chromatographische Charakterisierung organischer Verbindungen. Teil 1:  
639 Retentionsindices aliphatischer Halogenide, Alkohole, Aldehyde und Ketone. *Helv. Chim. Acta.*  
640 41(7):1915-1932.  
641  
642

1 **Supplementary Information for**  
2 **Marine metabolomics: a method for the non-targeted measurement**  
3 **of metabolites in seawater by gas-chromatography mass**  
4 **spectrometry.**

5

6 E. Maggie Sogin<sup>1\*</sup>, Erik Puskas<sup>1</sup>, Nicole Dubilier<sup>1</sup>, Manuel Liebeke<sup>1\*</sup>

7 \*Corresponding authors

8 Maggie Sogin, email: [esogin@mpi-bremen.de](mailto:esogin@mpi-bremen.de), tel: +49 421 2028-823

9 Manuel Liebeke email: [mliebeke@mpi-bremen.de](mailto:mliebeke@mpi-bremen.de), tel: +49 421 2028-822

10 *This PDF file includes*

11 Figures S1-S3

12 Tables S1-S6

13 Supplementary Text 1

14 Supplementary references

15

16

17

18

19

20

1  
2  
3  
4  
5  
6

## Supporting Figures and Tables

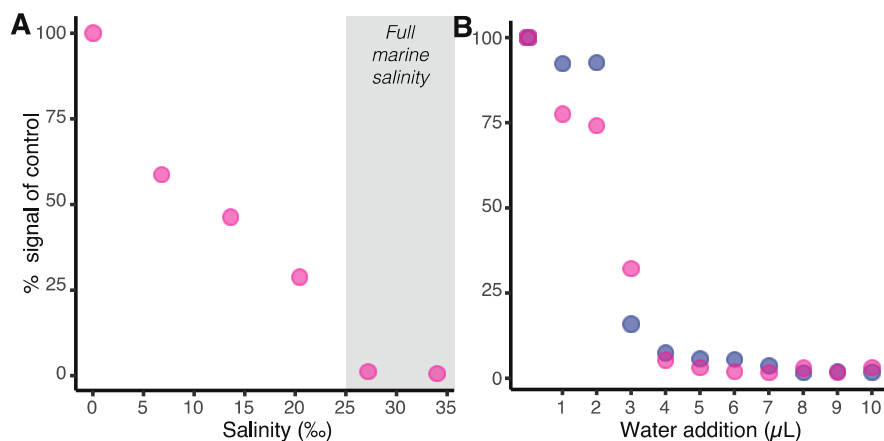

7  
8  
9  
10  
11  
12  
13  
14  
15

**Figure S1. Salt and water inhibit metabolite derivatization reactions.** Total detected ion signals are negatively related to increasing concentrations of **A**, salt and **B**, water for both MSTFA (red circles) and BSTFA (blue circles) derivatization reagents. Signals intensities from the metabolite mixture (**Table S6**) are relative to control samples (**A**, no salt; **B**, no water). To avoid damage to the GC-MS instrumentation, only 1 replicate / condition was analyzed.

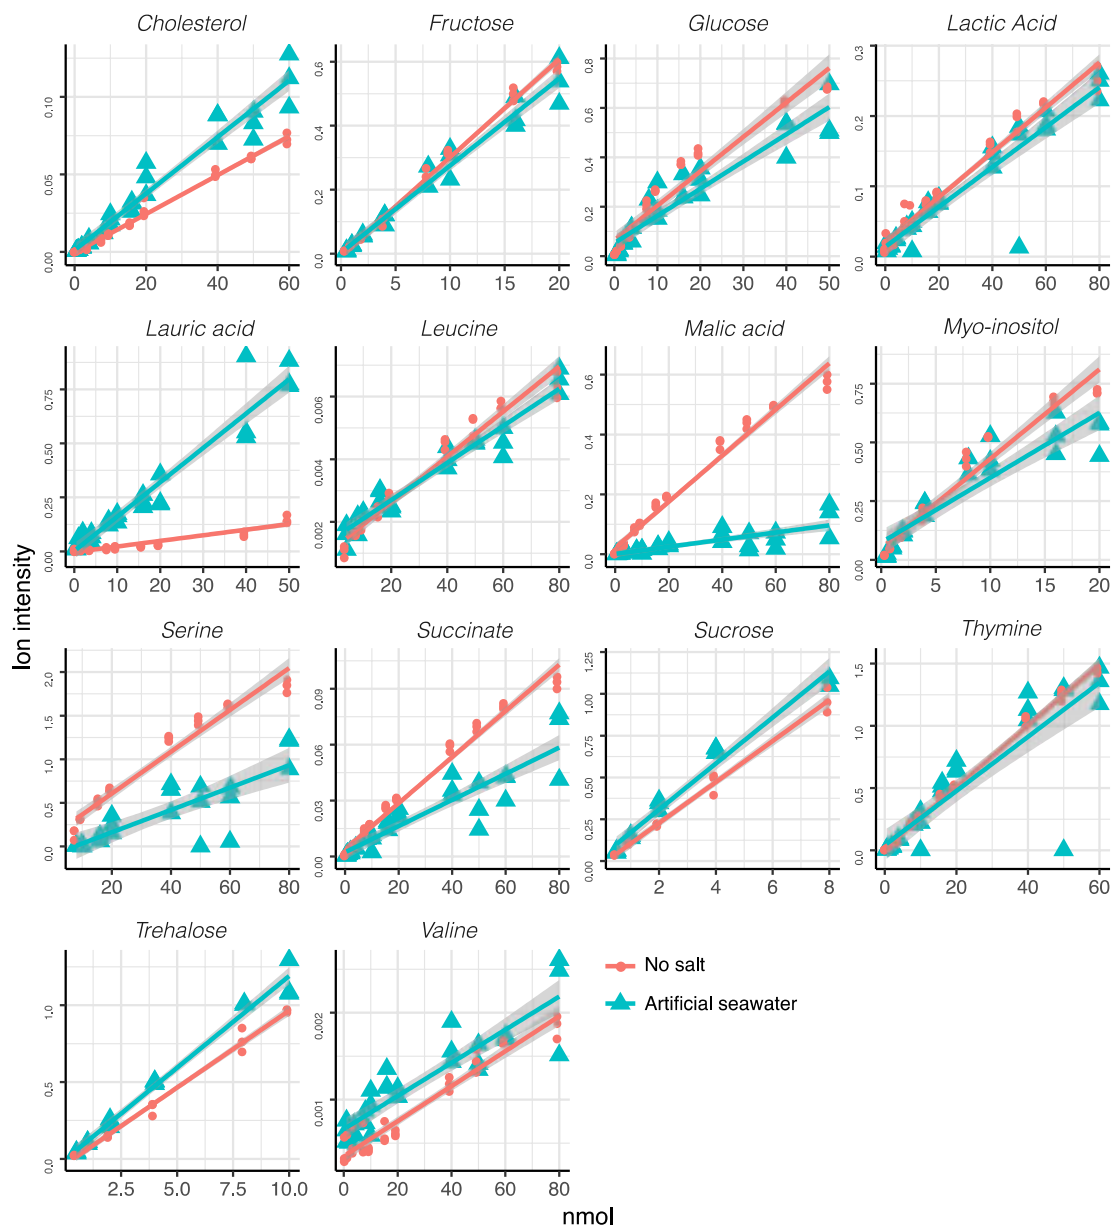

1  
2  
3  
4  
5  
6  
7  
8  
9  
10

**Figure S2. Calibration curves for individual metabolites in salt free and artificial seawater (ASW).** Calculated calibration curves were compared for compounds that were detected in both salt-free and ASW conditions (n=3 for each concentration). Gray shading represents 90% confidence intervals and points are fitted using a linear regression. Model results are reported in Table S2.



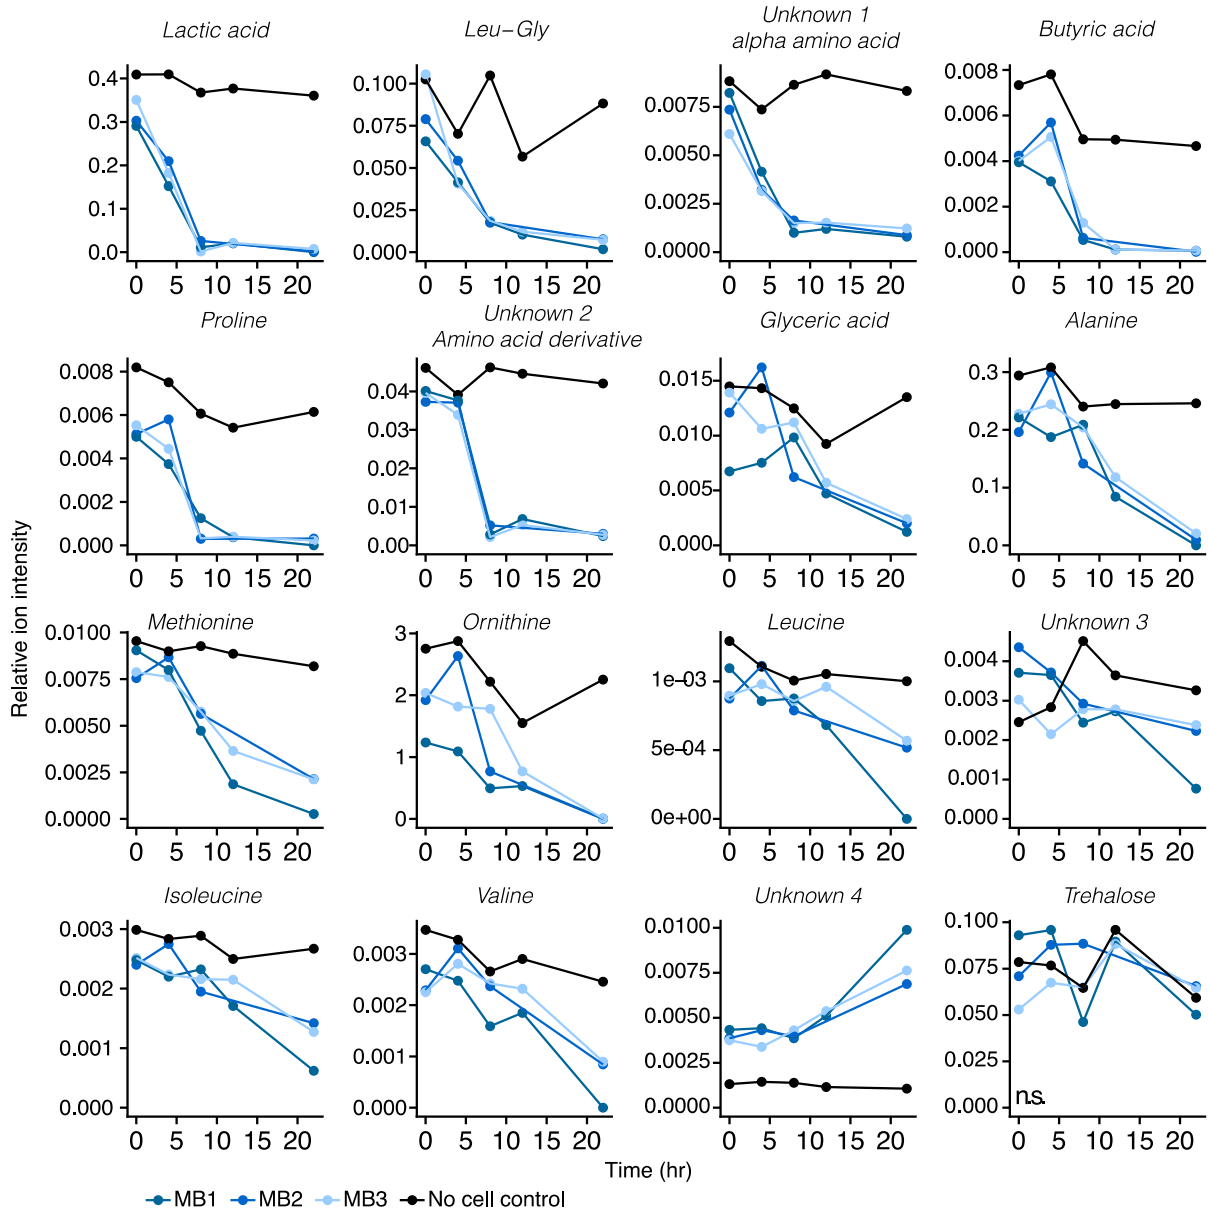

1  
 2 **Figure S3. Extracellular metabolite levels shift with cell culture density.** Metabolite relative  
 3 abundances for each cell culture and no-cell control are plotted through time. Only metabolites  
 4 that significantly (adjusted  $p$ -value < 0.05) varied with time in replicate culture experiments are  
 5 plotted for clarity.

6  
 7  
 8  
 9  
 10

1 **Table S1.** Mixture of 45 metabolites used for the development and testing of the sample  
 2 preparation method, with their retention times as detected in samples dissolved in artificial  
 3 seawater using GC-MS. Metabolites with multiple retention times represent different TMS  
 4 derivatives.

| Compound                   | Retention time (s) | Compound class    |
|----------------------------|--------------------|-------------------|
| Alanine                    | 883                | Amino acid        |
| Arginine                   | Not detected       | Amino acid        |
| Aspartic acid              | 788                | Amino acid        |
| Carnitine                  | Not detected       | Amino acid        |
| Cellobiose                 | 1536               | Disaccharides     |
| Citric acid                | Not detected       | Organic acid      |
| Cysteine                   | Not detected       | Amino acid        |
| Dimethylsulfonylpropionate | Not detected       | Organic compound  |
| Fructose                   | 1099/1106          | Monosaccharides   |
| Fumerate                   | 732                | Organic acid      |
| Galactose                  | 1109               | Aldoses           |
| Glucose                    | 1112               | Monosaccharides   |
| Glutamate                  | Not detected       | Amino acid        |
| Glutamic acid              | 931                | Amino acid        |
| Glutamine                  | 824                | Amino acid        |
| Glycerophosphate           | Not detected       | Organic compound  |
| Glycine                    | 700                | Amino acid        |
| Histidine                  | Not detected       | Amino acid        |
| Isoleucine                 | 687                | Amino acid        |
| Lactic acid                | 512                | Organic acid      |
| Lauric acid                | 956                | Fatty acid        |
| Leucine                    | 582/669            | Amino acid        |
| Lysine                     | 1130               | Amino acid        |
| Maleic acid                | 695                | Dicarboxylic acid |
| Malic acid                 | 835                | Dicarboxylic acid |
| Maltose                    | 1557/1565          | Disaccharides     |
| Mannitol                   | 1138               | Sugar alcohol     |
| Mannose                    | 1118               | Monosaccharides   |
| Methionine                 | 781/860            | Amino acid        |
| Myo-inositol               | 1231               | Sugar alcohol     |
| NAG                        | 1223               | Sugar             |
| Ornithine                  | 931/1064           | Amino acid        |
| Oxalic Acid                | 558                | Dicarboxylic acid |
| Phenylalanine              | 938                | Amino acid        |
| Proline                    | 692                | Amino acid        |
| Pyruvate                   | Not detected       | Organic acid      |
| Ribose                     | 971                | Aldoses           |
| Serine                     | 659/738            | Amino acid        |
| Succinic acid              | 704                | Organic acid      |
| Sucrose                    | 1508               | Disaccharides     |
| Threonine                  | 785                | Amino acid        |
| Thymine                    | Not detected       | Amino acid        |
| Trehalose                  | 1557               | Disaccharides     |
| Tryptophan                 | 1289               | Amino acid        |
| Urea                       | 648                | Organic compound  |
| Valine                     | 534                | Amino acid        |

1 **Table S2.** Quantification ions, calibration coefficients, and retention of metabolites from each  
 2 compound class in no salt and salt conditions. The minimum and maximum calibration points of  
 3 select compounds from representatives of each metabolite class in artificial seawater are  
 4 reported. The lowest concentration at which signals were observed is reported for select  
 5 compounds.

| Compound                                 | Category     | quantification ion (m/z) | No salt             |                |            |                     | Salt           |             |                               |                               | Lowest conc.** |
|------------------------------------------|--------------|--------------------------|---------------------|----------------|------------|---------------------|----------------|-------------|-------------------------------|-------------------------------|----------------|
|                                          |              |                          | Retention time (s)  | r <sup>2</sup> | %CV 4 nmol | Retention time (s)  | r <sup>2</sup> | % CV 4 nmol | Min calibration point (nmol)* | Max calibration point (nmol)* |                |
| Glycine 3TMS                             | Amino acid   | 204.1                    | 689                 | 0.955          | 17.12      | 689                 | < 0.7          | 4.68        | 0.5                           | 80                            |                |
| Histidine 2TMS                           | Amino acid   | 218.1                    | 1126                | 0.973          | 20.73      | <i>Not detected</i> |                |             |                               |                               |                |
| Leucine 2 TMS                            | Amino acid   | 177.06                   | 659                 | 0.961          | 17.24      | 660                 | 0.939          | 25.93       | 4                             | 80                            |                |
| Lysine 3TMS                              | Amino acid   | 156.1                    | 989                 | 0.973          | 31.31      | <i>Not detected</i> |                |             |                               |                               |                |
| Lysine 4TMS                              | Amino acid   | 174.1                    | <i>Not detected</i> |                |            | 1127                | < 0.7          | 15.28       | 0.5                           | 80                            |                |
| Ornithine 3TMS                           | Amino acid   | 174.1                    | 928                 | 0.992          | 18.19      | <i>Not detected</i> |                |             |                               |                               |                |
| Ornithine 4TMS                           | Amino acid   | 174.1                    | <i>Not detected</i> |                |            | 1061                | < 0.7          | 17.38       | 0.5                           | 80                            |                |
| Serine 3TMS                              | Amino acid   | 204.16                   | 732                 | 0.957          | NA         | 733                 | < 0.7          |             | 8                             | 80                            |                |
| Thymine 2TMS                             | Amino acid   | 255.1                    | 765                 | 0.996          | 22.65      | 766                 | 0.775          | 7.11        | 0.5                           | 60                            | 0.25           |
| Valine 2TMS                              | Amino acid   | 188.09                   | 612                 | 0.94           | 32.15      | 614                 | 0.828          | 10.94       | 1                             | 80                            | 0.25           |
| Citrate/citric acid 3TMS                 | Organic acid | 244.14                   | 1061                | 0.954          | 16.68      | <i>Not detected</i> |                |             |                               |                               |                |
| Glutamic acid 3TMS                       | Organic acid | 339.13                   | 933                 | < 0.7          | 46.64      | <i>Not detected</i> |                |             |                               |                               |                |
| Glutamic acid 3TMS                       | Organic acid | 246.1                    | <i>Not detected</i> |                |            | 929                 | < 0.7          | 18.1        | 1                             | 80                            |                |
| Glutamic acid derivative - Hydroxproline | Organic acid | 216.09                   | 860                 | 0.995          | 18.33      | <i>Not detected</i> |                |             |                               |                               |                |
| Glutamic acid derivative - Hydroxproline | Organic acid | 221.09                   | 860                 | < 0.7          | 14.13      | 859                 | < 0.7          | 4.68        | 0.5                           | 80                            |                |
| Lactic Acid 2TMS                         | Organic acid | 191.1                    | 478                 | 0.971          | 20.21      | 480                 | 0.877          | 7.28        | 0.5                           | 80                            | 0.0312         |
| Lauric acid TMS                          | Organic acid | 257.2                    | 955                 | 0.903          | 34.18      | 955                 | 0.938          | 37.16       | 0.5                           | 50                            | 0.0312         |
| Malic acid 3TMS                          | Organic acid | 233.1                    | 832                 | 0.98           | 14.04      | 832                 | < 0.7          | 11.45       | 0.5                           | 80                            |                |
| Succinate 2TMS                           | Organic acid | 172.1                    | 696                 | 0.982          | 15.94      | 696                 | 0.835          | 5.71        | 0.5                           | 80                            | 0.25           |
| Cholesterol TMS                          | Sterol       | 247.25                   | 1716                | 0.99           | 34.42      | 1717                | 0.954          | 26.18       | 0.5                           | 60                            | 0.5            |
| Fructose 5TMS                            | Sugar        | 307.2                    | 1093                | 0.994          | 12.6       | 1093                | 0.971          | 16.89       | 0.5                           | 20                            | 0.0312         |
| Glucose 5TMS                             | Sugar        | 205.1                    | 1121                | 0.982          | 24.61      | 1120                | 0.804          | 15.18       | 0.5                           | 80                            | 0.125          |
| Sucrose 8TMS                             | Sugar        | 361.27                   | 1495                | 0.989          | 13.5       | 1495                | 0.975          | 2.44        | 0.5                           | 8                             | 0.0312         |

|                              |                  |        |      |       |       |      |       |       |     |    |        |
|------------------------------|------------------|--------|------|-------|-------|------|-------|-------|-----|----|--------|
| <b>Trehalose<br/>8TMS</b>    | Sugar            | 361.27 | 1543 | 0.991 | 12.91 | 1543 | 0.985 | 2.07  | 0.5 | 10 | 0.0312 |
| <b>Myo-inositol<br/>6TMS</b> | Sugar<br>alcohol | 305    | 1223 | 0.947 | 14.19 | 1224 | 0.853 | 14.34 | 0.5 | 20 | 0.0312 |

- 1 CV = % coefficient of variation
- 2 \*nmol in 0.5 mL of artificial seawater
- 3 \*\* For selected compounds in artificial seawater
- 4
- 5
- 6
- 7
- 8
- 9
- 10
- 11
- 12
- 13
- 14
- 15
- 16
- 17
- 18
- 19
- 20
- 21
- 22
- 23
- 24
- 25
- 26
- 27
- 28
- 29
- 30
- 31
- 32
- 33
- 34
- 35
- 36
- 37
- 38
- 39
- 40
- 41

1 **Table S3.** Targeted techniques for the quantification of specific metabolite classes in seawater

| <b>Compound class</b>                     | <b>Sample pre-treatment</b>                                                | <b>Detection method</b>                                                     | <b>Limit of detection</b> | <b>Amount of sample required</b> | <b>Ref</b>  |
|-------------------------------------------|----------------------------------------------------------------------------|-----------------------------------------------------------------------------|---------------------------|----------------------------------|-------------|
| Amino acids                               | o-phthalaldehyde/2-mercaptoethanol derivatization                          | High performance liquid chromatography                                      | fM                        | 25 $\mu$ L                       | <b>1</b>    |
| Sugars: Monosaccharides and disaccharides | Acid hydrolysis, desalting                                                 | High performance anion exchange chromatography-pulsed amperometric detector | nM                        | ~12 mL                           | <b>2</b>    |
| Sterols                                   | Derivatization                                                             | GC-MS                                                                       | nM                        | 1 L                              | <b>3</b>    |
|                                           | Solid phase extraction                                                     | LC/ESI-MS/MS                                                                | pM                        | 5 L                              | <b>4</b>    |
| Fatty acids                               | Solvent extraction                                                         | GC-MS                                                                       | $\mu$ M                   | 90 L                             | <b>5, 6</b> |
| Organic acids                             | Derivatization with 2-nitrophenyl hydrazine and carbodiimine hydrochloride | High pressure liquid chromatography with ion pairing                        | nM                        | 2 mL                             | <b>7</b>    |

2  
3  
4  
5  
6  
7  
8  
9  
10  
11  
12  
13  
14  
15  
16  
17  
18

- 1 **Table S4.** Retention times, quantification and qualification ions of the 107 metabolite standards
- 2 detected in artificial seawater using SeaMet. Kyoto Encyclopedia of Genes and Genomes
- 3 (KEGG ID) ids and associated BRITE functional hierarchy or metabolite class of each
- 4 compound are indicated.

| <b>Metabolite standard</b>  | <b>Manufacture company</b> | <b>KEGG ID</b> | <b>BRITE hierarchy/<br/>General category</b>       | <b>Retention time (s)</b> | <b>Quantification ion</b> | <b>Qualifying ions</b> |
|-----------------------------|----------------------------|----------------|----------------------------------------------------|---------------------------|---------------------------|------------------------|
| β-D-allose                  | Biolog                     | NA             | Aldohexose sugar                                   | 1111                      | 205                       | 189; 147               |
| 3-methyl glucose            | Biolog                     | NA             | Sugar                                              | 1086                      | 204                       | 217; 147               |
| D-galactonic acid-γ-lactone | Biolog                     | NA             | Sugar                                              | 1066                      | 261                       | 217; 160               |
| Lactulose                   | Biolog                     | C07064         | Sugar                                              | 1553                      | 307                       | 361; 217               |
| N-acetyl-β-D-galactosamine  | Biolog                     | NA             | Sugar                                              | 1221                      | 205                       | 319; 274               |
| α-methyl-D-galactoside      | Biolog                     | NA             | Sugar                                              | 1095                      | 307                       | 217; 103               |
| β-methyl-D-glucoside        | Biolog                     | NA             | Sugar                                              | 1113                      | 331                       | 215; 129               |
| β-methyl-D-glucuronic acid  | Biolog                     | NA             | Sugar                                              | 1173                      | 292                       | 305; 319               |
| β-methyl-D-xyloside         | Biolog                     | NA             | Sugar                                              | 997                       | 205                       | 319; 147               |
| D-arabinose                 | Biolog                     | C00216         | Carbohydrates;<br>Monosaccharides;<br>Aldoses      | 962                       | 307                       | 217; 189               |
| D-mannose                   | Biolog                     | C00159         | Carbohydrates;<br>Monosaccharides;<br>Aldoses      | 1126                      | 203                       | 217; 301               |
| D-ribose                    | Biolog                     | C00121         | Carbohydrates;<br>Monosaccharides;<br>Aldoses      | 973                       | 204                       | 217; 147               |
| D-xylose                    | Biolog                     | C00181         | Carbohydrates;<br>Monosaccharides;<br>Aldoses      | 959                       | 217                       | 307; 103               |
| Galactose                   | Sigma-Aldrich              | C00124         | Carbohydrates;<br>Monosaccharides;<br>Aldoses      | 1124                      | 319                       | 147; 205; 217          |
| Glucose                     | AppliChem                  | C00031         | Carbohydrates;<br>Monosaccharides;<br>Aldoses      | 1120                      | 321                       | 147; 160; 205          |
| L-arabinose                 | Biolog                     | C00259         | Carbohydrates;<br>Monosaccharides;<br>Aldoses      | 969                       | 217                       | 307; 277               |
| L-lyxose                    | Biolog                     | C01508         | Carbohydrates;<br>Monosaccharides;<br>Aldoses      | 956                       | 217                       | 307; 189               |
| D-glucosamine               | Biolog                     | C00329         | Carbohydrates;<br>Monosaccharides;<br>Amino sugars | 1141                      | 217                       | 307; 319               |
| N-acetyl-D-galactosamine    | Biolog                     | C01132         | Carbohydrates;<br>Monosaccharides;<br>Amino sugars | 1505                      | 230                       | 245; 217               |
| N-acetyl-D-glucosamine      | Biolog                     | C00140         | Carbohydrates;<br>Monosaccharides;<br>Amino sugars | 1234                      | 319                       | 205; 333               |
| N-acetyl-D-glucosaminitol   | Biolog                     | C00140         | Carbohydrates;<br>Monosaccharides;<br>Amino sugars | 1220                      | 319                       | 205; 202               |

| <b>Metabolite standard</b> | <b>Manufacture company</b> | <b>KEGG ID</b> | <b>BRITE hierarchy/<br/>General category</b>         | <b>Retention time (s)</b> | <b>Quantification ion</b> | <b>Qualifying ions</b> |
|----------------------------|----------------------------|----------------|------------------------------------------------------|---------------------------|---------------------------|------------------------|
| 2-deoxy-D-ribose           | Biolog                     | C01801         | Carbohydrates;<br>Monosaccharides;<br>Deoxy sugars   | 898                       | 174                       | 250; 100               |
| D-mannosamine              | Biolog                     | C03570         | Carbohydrates;<br>Monosaccharides;<br>Deoxy sugars   | 999                       | 217                       | 319; 205               |
| L-fucose                   | Biolog                     | C01019         | Carbohydrates;<br>Monosaccharides;<br>Deoxy sugars   | 1015                      | 174                       | 214; 200               |
| L-rhamnose                 | Biolog                     | C00507         | Carbohydrates;<br>Monosaccharides;<br>Deoxy sugars   | 1032                      | 189                       | 217; 147               |
| D-psicose                  | Biolog                     | C06568         | Carbohydrates;<br>Monosaccharides;<br>Ketoses        | 1097                      | 307                       | 217; 277               |
| D-tagatose                 | Biolog                     | C00795         | Carbohydrates;<br>Monosaccharides;<br>Ketoses        | 1110                      | 319                       | 217; 205               |
| Fructose                   | Sigma-Aldrich              | C00095         | Carbohydrates;<br>Monosaccharides;<br>Ketoses        | 1098                      | 307                       | 147; 217; 277          |
| L-sorbose                  | Biolog                     | C00247         | Carbohydrates;<br>Monosaccharides;<br>Ketoses        | 1113                      | 204                       | 217; 147               |
| Dulcitol                   | Biolog                     | C01697         | Sugar alcohol                                        | 1145                      | 217                       | 252; 233               |
| I-Erythritol               | Biolog                     | C00503         | Sugar alcohol                                        | 869                       | 304                       | 174; 147               |
| D-arabitol                 | Biolog                     | C01904         | Sugar alcohol                                        | 1001                      | 205                       | 307; 319               |
| L-arabitol                 | Biolog                     | C00532         | Sugar alcohol                                        | 1002                      | 319                       | 307; 205               |
| Lactitol                   | Biolog                     | NA             | Sugar alcohol                                        | 1584                      | 361                       | 204; 217               |
| Maltitol                   | Biolog                     | NA             | Sugar alcohol                                        | 1596                      | 361                       | 217; 204               |
| Mannitol                   | Fluka                      | C00392         | Carbohydrates;<br>Monosaccharides;<br>Sugar alcohols | 1135                      | 319                       | 147; 205; 217          |
| Myo-inositol               | Fluka                      | C00137         | Carbohydrates;<br>Monosaccharides;<br>Sugar alcohols | 1224                      | 305                       | 147; 217; 305          |
| Sorbitol                   | Merck                      | C00794         | Carbohydrates;<br>Monosaccharides;<br>Sugar alcohols | 1134                      | 319                       | 205; 217; 307          |
| D-melibiose                | Biolog                     | C05402         | Carbohydrates;<br>Oligosaccharides;<br>Disaccharides | 1764                      | 363                       | 469; 334               |
| Gentiobiose                | Biolog                     | C08240         | Carbohydrates;<br>Oligosaccharides;<br>Disaccharides | 1593                      | 361                       | 345; 217               |
| Maltose                    | Sigma-Aldrich              | C00208         | Carbohydrates;<br>Oligosaccharides;<br>Disaccharides | 1550                      | 361                       | 204; 217; 319          |
| Palatinose                 | Biolog                     | C01742         | Carbohydrates;<br>Oligosaccharides;<br>Disaccharides | 1603                      | 361                       | 204; 217               |
| Sucrose                    | Fluka                      | C00089         | Carbohydrates;<br>Oligosaccharides;<br>Disaccharides | 1495                      | 361                       | 73; 147; 217           |

| <b>Metabolite standard</b>                           | <b>Manufacture company</b> | <b>KEGG ID</b> | <b>BRITE hierarchy/<br/>General category</b>                                                               | <b>Retention time (s)</b> | <b>Quantification ion</b> | <b>Qualifying ions</b> |
|------------------------------------------------------|----------------------------|----------------|------------------------------------------------------------------------------------------------------------|---------------------------|---------------------------|------------------------|
| Trehalose                                            | Fluka                      | C01083         | Carbohydrates;<br>Oligosaccharides;<br>Disaccharides                                                       | 1543                      | 377                       | 147; 191; 217          |
| Turanose                                             | Biolog                     | C19636         | Carbohydrates;<br>Oligosaccharides;<br>Disaccharides                                                       | 1561                      | 361                       | 345; 319               |
| $\alpha$ -D-Lactose                                  | Biolog                     | C00243         | Carbohydrates;<br>Oligosaccharides;<br>Disaccharides                                                       | 1530                      | 361                       | 217; 204               |
| Lauric acid                                          | Fluka                      | C002679        | Lipids; Fatty acids;<br>Saturated fatty acids                                                              | 955                       | 215                       | 117; 201; 257          |
| Capric acid                                          | Biolog                     | C01571         | Lipids; Fatty acids;<br>Saturated fatty acids                                                              | 823                       | 247                       | 359; 147               |
| Sebacic acid                                         | Biolog                     | C08277         | Lipids; Fatty acyls;<br>Fatty acids and<br>conjugates;<br>Dicarboxylic acids                               | 1116                      | 319                       | 205; 217               |
| Beta-sitosterol                                      | Biolog                     | C01753         | Lipids; Sterol lipids;<br>Sterols                                                                          | 1176                      | 333                       | 292; 319               |
| Cholesterol                                          | Sigma-Aldrich              | C00187         | Lipids; Sterol lipids;<br>Sterols                                                                          | 1717                      | 247                       | 129; 329; 443          |
| Ergosterol                                           | Biolog                     | C01694         | Lipids; Sterol lipids;<br>Sterols                                                                          | 1784                      | 485                       | 394; 255               |
| Stigmasterol                                         | Biolog                     | C05442         | Lipids; Sterol lipids;<br>Sterols                                                                          | 1814                      | 357                       | 396; 487               |
| Thymine                                              | Fluka                      | C00178         | Nucleic acids; Bases;<br>Pyrimidine                                                                        | 766                       | 255                       | 113; 147; 270          |
| Uracil                                               | Biolog                     | C00106         | Nucleic acids; Bases;<br>Pyrimidine                                                                        | 724                       | 259                       | 215; 147               |
| Adenosine                                            | Biolog                     | C00212         | Nucleic acids;<br>Nucleosides;<br>Ribonucleosides                                                          | 1527                      | 361                       | 204; 217               |
| 2-hydroxybenzoic acid                                | Biolog                     | C00805         | Organic acid                                                                                               | 737                       | 146                       | 103; 73                |
| 4-hydroxybenzoic acid                                | Biolog                     | C00156         | Organic acid                                                                                               | 941                       | 292                       | 219; 189               |
| Citraconic acid                                      | Biolog                     | C02226         | Organic acid                                                                                               | 733                       | 195                       | 177; 120               |
| Citramalic acid                                      | Biolog                     | C00851         | Organic acid                                                                                               | 827                       | 158                       | 260; 68                |
| D-tartaric acid                                      | Biolog                     | C02107         | Organic acid                                                                                               | 948                       | 252                       | 281; 296               |
| D,L- $\alpha$ -amino-N-butyric acid                  | Biolog                     | NA             | Organic acid                                                                                               | 516                       | 177                       | 205; 161               |
| Glycolic acid                                        | Biolog                     | C00160         | Organic acid                                                                                               | 528                       | 174                       | 202; 116               |
| m-hydroxyphenylacetic acid                           | Biolog                     | NA             | Organic acid                                                                                               | 939                       | 174                       | 318; 200               |
| Mucic acid                                           | Biolog                     | C00879         | Organic acid                                                                                               | 1217                      | 378                       | 319; 246               |
| p-hydroxyphenylacetic Acid                           | Biolog                     | NA             | Organic acid                                                                                               | 949                       | 217                       | 147; 307               |
| Sorbic acid                                          | Biolog                     | NA             | Organic acid                                                                                               | 665                       | 174                       | 147; 100               |
| $\alpha$ -hydroxybutyric acid                        | Biolog                     | NA             | Organic acid                                                                                               | 578                       | 191                       | 233; 147               |
| $\alpha$ -hydroxyglutaric acid(- $\gamma$ -lactone ) | Biolog                     | NA             | Organic acid                                                                                               | 927                       | 296                       | 281; 164               |
| $\delta$ -amino-N-valeric acid                       | Biolog                     | C00803         | Organic acid;<br>Carboxylic acid;<br>Monocarboxylic acids/<br>ALT: Lipids; Fatty<br>acyls; Fatty acid sand | 941                       | 267                       | 223; 193               |



| Metabolite standard          | Manufacture company | KEGG ID | BRITE hierarchy/<br>General category                           | Retention time (s) | Quantification ion | Qualifying ions          |
|------------------------------|---------------------|---------|----------------------------------------------------------------|--------------------|--------------------|--------------------------|
|                              |                     |         | conjugates; Straight chain fatty acids                         |                    |                    |                          |
| Acetic acid                  |                     | C00033  | Organic acids;<br>Carboxylic acids;<br>Monocarboxylic acids    | 509                | 147                | 73; 137                  |
| Propionic acid               |                     | C00163  | Organic acids;<br>Carboxylic acids;<br>Monocarboxylic acids    | 497                | 147                | 117; 191                 |
| Fumarate                     | Fluka               | C00122  | Dicarboxylic acid                                              | 727                | 245                | 143; 147; 217            |
| Itaconic acid                | Biolog              | C00490  | Dicarboxylic acid                                              | 729                | 147                | 259; 73                  |
| Maleic acid                  | Fluka               | C01384  | Dicarboxylic acid                                              | 692                | 245                | 73; 147; 215             |
| Succinate                    | Merck               | C00042  | Organic acids;<br>Carboxylic acids;<br>Dicarboxylic acids      | 696                | 262                | 129; 147; 247            |
| Lactic acid                  | Fluka               | C00186  | Organic acids;<br>Carboxylic acids;<br>Hydroxycarboxylic acids | 480                | 193                | 117; 147; 191            |
| Malic acid                   | Sigma-Aldrich       | C00149  | Organic acids;<br>Carboxylic acids;<br>Hydroxycarboxylic acids | 832                | 233                | 147; 245; 307            |
| $\beta$ -hydroxybutyric acid | Biolog              | C01089  | Organic acids;<br>Carboxylic acids;<br>Hydroxycarboxylic acids | 580                | 86                 | 188; 75                  |
| N-butylamine                 | Biolog              | C18706  | Organic compound                                               | 555                | 205                | 190; 233                 |
| Urea                         | Fluka               | C00086  | Organic compound                                               | 644                | 189                | 73; 147; 171             |
| D,L-octopamine               | Biolog              | C04227  | Organic compound                                               | 1200               | 333                | 292; 305                 |
| Ethanolamine                 | Biolog              | C00189  | Peptides; Amines;<br>Biogenic amines                           | 690                | 219                | 130; 117                 |
| Phenylethyl-amine            | Biolog              | C05332  | Peptides; Amines;<br>Biogenic amines                           | 899                | 247                | 203; 147                 |
| Putrescine                   | Biolog              | C00134  | Peptides; Amines;<br>Biogenic amines                           | 1017               | 117                | 133; 160                 |
| Alanine                      | Fluka               | C00041  | Peptides; Amino acids;<br>Common amino acids                   | 531                | 218                | 116; 233; 258            |
| Aspartic acid                | Fluka               | C00049  | Peptides; Amino acids;<br>Common amino acids                   | 858                | 232                | 147; 218; 292            |
| Cysteine                     | Fluka               | C00097  | Peptides; Amino acids;<br>Common amino acids                   | 885                | 220                | 147; 204; 246            |
| Glutamic acid                | Merck               | C00025  | Peptides; Amino acids;<br>Common amino acids                   | 929                | 177                | 73; 147; 246             |
| Glycine                      | Fluka               | C00037  | Peptides; Amino acids;<br>Common amino acids                   | 689                | 204                | 147; 174; 248            |
| Isoleucine                   | Fluka               | C00407  | Peptides; Amino acids;<br>Common amino acids                   | 684                | 232                | 147; 158; 218            |
| L-phenylalanine              | Biolog              | C00079  | Peptides; Amino acids;<br>Common amino acids                   | 897                | 221                | 321; 147                 |
| Leucine                      | Biolog              | C00123  | Peptides; Amino acids;<br>Common amino acids                   | 598<br>660         | 169<br>177         | 125; 95<br>86; 146; 188  |
| Lysine                       | Fluka               | C00047  | Peptides; Amino acids;<br>Common amino acids                   | 1127               | 174                | 218; 230; 317            |
| Methionine                   | Sigma-Aldrich       | C00073  | Peptides; Amino acids;<br>Common amino acids                   | 779<br>860         | 221<br>176         | 104; 178; 206<br>128; 73 |

| <b>Metabolite standard</b>  | <b>Manufacture company</b> | <b>KEGG ID</b> | <b>BRITE hierarchy/<br/>General category</b> | <b>Retention time (s)</b> | <b>Quantification ion</b> | <b>Qualifying ions</b> |
|-----------------------------|----------------------------|----------------|----------------------------------------------|---------------------------|---------------------------|------------------------|
| Proline                     |                            | C00148         | Peptides; Amino acids;<br>Common amino acids | 689                       | 216                       | 142; 189; 244          |
| Serine                      | Fluka                      | C00065         | Peptides; Amino acids;<br>Common amino acids | 733                       | 204                       | 73; 116; 132           |
| Threonine                   | Biolog                     | C00188         | Peptides; Amino acids;<br>Common amino acids | 720<br>756                | 255<br>291                | 147; 219; 320          |
| Valine                      | Sigma-Aldrich              | C00183         | Peptides; Amino acids;<br>Common amino acids | 614                       | 188                       | 130; 146; 174          |
| Hydroxy-L-proline           | Biolog                     | C01157         | Peptides; Amino acids;<br>Other amino acids  | 849                       | 307                       | 205; 217               |
| L-homoserine                | Biolog                     | C00263         | Peptides; Amino acids;<br>Other amino acids  | 816                       | 229                       | 117; 129               |
| Ornithine                   | Merck                      | C00077         | Peptides; Amino acids;<br>Other amino acids  | 1061                      | 162                       | 73; 142; 174           |
| $\gamma$ -aminobutyric acid | Biolog                     | C00334         | Peptides; Amino acids;<br>Other amino acids  | 897                       | 120                       | 146; 91                |
| Gly-Glu                     | Biolog                     | NA             | Dipeptide                                    | 1193                      | 267                       | 174; 426               |

1  
2  
3  
4  
5  
6  
7  
8  
9  
10  
11  
12  
13  
14  
15  
16  
17  
18  
19  
20  
21  
22  
23  
24  
25  
26  
27  
28  
29

1 **Table S5.** Major metabolite peaks found in marine sediment porewaters and their retention  
 2 times. Compounds that did not match NIST database entries are labeled as “unknown” followed  
 3 by their retention time. Mass spectra from these compounds were also compared to both the  
 4 Golm and BinBase databases using the Kovats retention time index adjustment. Golm predicted  
 5 functional groups and BinBase splash id’s are reported when unknowns matched database hits.

| Habitat   | Annotation            | Retention time (s) | Class                     | Unknown Compounds      |                                                                         |                                               |
|-----------|-----------------------|--------------------|---------------------------|------------------------|-------------------------------------------------------------------------|-----------------------------------------------|
|           |                       |                    |                           | Kovats retention index | Golm predicted functional groups                                        | BinBase related splash ID                     |
| Coralline | Lactic acid           | 499                | Organic acid              |                        |                                                                         |                                               |
|           | Acetate               | 512                | Organic acid              |                        |                                                                         |                                               |
|           | Alanine               | 533                | Amino acid                |                        |                                                                         |                                               |
|           | Glycerol              | 666                | Sugar alcohol             |                        |                                                                         |                                               |
|           | Glycine               | 695                | Amino acid                |                        |                                                                         |                                               |
|           | Succinate             | 699                | Organic acid              |                        |                                                                         |                                               |
|           | Propanoic acid        | 713                | Organic acid              |                        |                                                                         |                                               |
|           | Unknown 893           | 895                |                           | 1563                   | No hits                                                                 | No hits                                       |
|           | Unknown 1031          | 1031               |                           | 1759                   | Primary alcohol<br>Secondary alcohol<br>Alcohol<br>1,2, diol<br>Hydroxy | splash10-0fvj-0920000000-2b50a374508a5be92557 |
|           | Azelaic acid          | 1048               | Fatty Acid                |                        |                                                                         |                                               |
|           | Unknown compound 1073 | 1073               |                           | 1823                   | Hydroxy<br>Alcohol<br>Carboxylic acid                                   | No hits                                       |
|           | Pinitol               | 1089               | Sugar alcohol             |                        |                                                                         |                                               |
|           | Fructose              | 1101               | Sugar                     |                        |                                                                         |                                               |
|           | Galactose             | 1108               | Sugar                     |                        |                                                                         |                                               |
|           | Galactose             | 1112               | Sugar                     |                        |                                                                         |                                               |
|           | Mannitol              | 1138               | Sugar alcohol             |                        |                                                                         |                                               |
| Sucrose   | 1503                  | Sugar              |                           |                        |                                                                         |                                               |
| Trehalose | 1553                  | Sugar              |                           |                        |                                                                         |                                               |
| Mangrove  | Lactic acid           | 499                | Organic acid              |                        |                                                                         |                                               |
|           | Acetate               | 512                | Organic acid              |                        |                                                                         |                                               |
|           | Glycerol              | 666                | Sugar alcohol             |                        |                                                                         |                                               |
|           | Succinate             | 699                | Organic acid              |                        |                                                                         |                                               |
|           | Pentanoic acid        | 914                | Organic acid              |                        |                                                                         |                                               |
|           | Lauric acid           | 937                | Straight chain fatty acid |                        |                                                                         |                                               |
|           | Lauric acid           | 956                | Straight chain fatty acid |                        |                                                                         |                                               |
|           | Unknown 1031          | 1031               |                           | 1759                   | Primary alcohol<br>Secondary alcohol<br>Alcohol<br>1,2, diol<br>Hydroxy | splash10-0fvj-0920000000-2b50a374508a5be92557 |
|           | Azelaic acid          | 1048               | Fatty Acid                |                        |                                                                         |                                               |
|           | Aromatic dione        | 1126               |                           |                        |                                                                         |                                               |
|           | Mannitol              | 1138               | Sugar alcohol             |                        |                                                                         |                                               |
|           | Palmitic acid         | 1177               | Straight chain fatty acid |                        |                                                                         |                                               |
|           | Isooctyl laurate      | 1235               | Straight chain fatty acid |                        |                                                                         |                                               |
|           | Lauric acid           | 1289               | Straight chain fatty acid |                        |                                                                         |                                               |
|           | Myristic acid         | 1371               | Straight chain fatty acid |                        |                                                                         |                                               |
|           | Myristic acid         | 1388               | Straight chain fatty acid |                        |                                                                         |                                               |

| Habitat | Annotation            | Retention time (s) | Class                     | Unknown Compounds      |                                                          |                                               |
|---------|-----------------------|--------------------|---------------------------|------------------------|----------------------------------------------------------|-----------------------------------------------|
|         |                       |                    |                           | Kovats retention index | Golm predicted functional groups                         | BinBase related splash ID                     |
|         | Pentadecanoic acid    | 1434               | Straight chain fatty acid |                        |                                                          |                                               |
|         | Hexadecanoic acid     | 1464               | Straight chain fatty acid |                        |                                                          |                                               |
|         | Hexadecanoic acid     | 1481               | Straight chain fatty acid |                        |                                                          |                                               |
|         | Sucrose               | 1503               | Sugar                     |                        |                                                          |                                               |
|         | Heptadecanoic acid    | 1509               | Straight chain fatty acid |                        |                                                          |                                               |
|         | Heptadecanoic acid    | 1524               | Straight chain fatty acid |                        |                                                          |                                               |
|         | 2-Monostearin         | 1552               | Straight chain fatty acid |                        |                                                          |                                               |
|         | Octadecanoic acid     | 1569               | Straight chain fatty acid |                        |                                                          |                                               |
|         | Unknown peak 1595     | 1595               |                           | 2832                   | Alcohol                                                  | No hits                                       |
|         | Nonadecanoic acid     | 1607               | Straight chain fatty acid |                        |                                                          |                                               |
|         | Unknown 1634          | 1635               |                           | 2930                   | Alcohol<br>Hydroxy<br>Primary alcohol                    | No hits                                       |
|         | Eicosanoic acid       | 1647               | Straight chain fatty acid |                        |                                                          |                                               |
|         | Unkonwn 1669          | 1672               |                           | 3023                   | Alcohol<br>Hydroxy<br>Primary alcohol                    | No hits                                       |
|         | Unknown Compound 1720 | 1721               |                           | 3151                   | Hydroxy<br>Alcohol<br>Carboxylic acid<br>Primary alcohol | splash10-05o0-1910000000-49e59c211689b393e2a6 |
|         | Unknown compound 1732 | 1734               |                           | 3185                   | Alcohol<br>Hydroxy<br>Primary alcohol                    | No hits                                       |
|         | Unknown compound 1746 | 1746               |                           | 3215                   | Alcohol<br>Hydroxy<br>Primary alcohol                    | No hits                                       |
|         | Unknown 2005          | 2005               |                           | 3691                   | Alcohol<br>Hydroxy<br>Alkene                             | No hits                                       |
|         | Unknown 2030          | 2035               |                           | NA                     | Hydroxy                                                  | No hits                                       |

1  
2  
3  
4  
5  
6  
7  
8  
9  
10  
11  
12  
13  
14  
15  
16  
17

- 1 **Table S6.** Metabolite mixtures used across experiments. All mixtures contain a diverse range of
- 2 compounds representing multiple metabolite classes. A reduced set of compounds were
- 3 combined to both show the effects of salt and water on metabolite detection and create
- 4 calibration curves for specific compounds.

| <b>Compound</b> | <b>Class</b>     | <b>Experiment Mixture</b>  |
|-----------------|------------------|----------------------------|
| Pyruvate        | Alpha keto-acid  | Method development and SPE |
| Alanine         | Amino acid       | Method development and SPE |
| Arginine        | Amino acid       | Method development and SPE |
| Aspartic acid   | Amino acid       | Method development and SPE |
| Carnitine       | Amino acid       | Method development and SPE |
| Cysteine        | Amino acid       | Method development and SPE |
| Glutamate       | Amino acid       | Method development and SPE |
| Glutamic acid   | Amino acid       | Method development and SPE |
| Glutamine       | Amino acid       | Method development and SPE |
| Glycine         | Amino acid       | Method development and SPE |
| Histidine       | Amino acid       | Method development and SPE |
| Isoleucine      | Amino acid       | Method development and SPE |
| Lactic acid     | Amino acid       | Method development and SPE |
| Leucine         | Amino acid       | Method development and SPE |
| Lysine          | Amino acid       | Method development and SPE |
| Methionine      | Amino acid       | Method development and SPE |
| Ornithine       | Amino acid       | Method development and SPE |
| Phenylalanine   | Amino acid       | Method development and SPE |
| Proline         | Amino acid       | Method development and SPE |
| Serine          | Amino acid       | Method development and SPE |
| Threonine       | Amino acid       | Method development and SPE |
| Thymine         | Amino acid       | Method development and SPE |
| Tryptophan      | Amino acid       | Method development and SPE |
| Valine          | Amino acid       | Method development and SPE |
| Citric acid     | Organic acid     | Method development and SPE |
| Fumerate        | Organic acid     | Method development and SPE |
| Lauric acid     | Organic acid     | Method development and SPE |
| Maleic acid     | Organic acid     | Method development and SPE |
| Malic acid      | Organic acid     | Method development and SPE |
| Succinic acid   | Organic acid     | Method development and SPE |
| DMSP            | Organic compound | Method development and SPE |
| Oxalic Acid     | Organic compound | Method development and SPE |
| Urea            | Organic compound | Method development and SPE |
| Cellobiose      | Sugar            | Method development and SPE |
| Fructose        | Sugar            | Method development and SPE |
| Galactose       | Sugar            | Method development and SPE |
| Glucose         | Sugar            | Method development and SPE |
| Maltose         | Sugar            | Method development and SPE |
| Mannose         | Sugar            | Method development and SPE |
| NAG             | Sugar            | Method development and SPE |
| Ribose          | Sugar            | Method development and SPE |

|                     |                 |                               |
|---------------------|-----------------|-------------------------------|
| Sucrose             | Sugar           | Method development and SPE    |
| Trehalose           | Sugar           | Method development and SPE    |
| Mannitol            | Sugar alcohol   | Method development and SPE    |
| Myo-inositol        | Sugar alcohol   | Method development and SPE    |
| Glycerophosphate    | Sugar phosphate | Method development and SPE    |
| Alanine             | Amino acid      | Quantifying salt-water effect |
| Glutamine           | Amino acid      | Quantifying salt-water effect |
| Glycine             | Amino acid      | Quantifying salt-water effect |
| Lactate             | Amino acid      | Quantifying salt-water effect |
| Leucine             | Amino acid      | Quantifying salt-water effect |
| Lysine              | Amino acid      | Quantifying salt-water effect |
| Ornithine           | Amino acid      | Quantifying salt-water effect |
| Serine              | Amino acid      | Quantifying salt-water effect |
| Succinate           | Amino acid      | Quantifying salt-water effect |
| Thymine             | Amino acid      | Quantifying salt-water effect |
| Valine              | Amino acid      | Quantifying salt-water effect |
| Citric acid         | Organic acid    | Quantifying salt-water effect |
| Glutamic acid       | Organic acid    | Quantifying salt-water effect |
| Malic acid          | Organic acid    | Quantifying salt-water effect |
| Oxalic acid         | Organic acid    | Quantifying salt-water effect |
| Fructose            | Sugar           | Quantifying salt-water effect |
| Glucose             | Sugar           | Quantifying salt-water effect |
| NAG                 | Sugar           | Quantifying salt-water effect |
| Sucrose             | Sugar           | Quantifying salt-water effect |
| Trehalose           | Sugar           | Quantifying salt-water effect |
| Myo-inositol        | Sugar alcohol   | Quantifying salt-water effect |
| Glycine             | Amino acid      | Quantify detection limits     |
| Histidine           | Amino acid      | Quantify detection limits     |
| Leucine             | Amino acid      | Quantify detection limits     |
| Lysine              | Amino acid      | Quantify detection limits     |
| Ornithine           | Amino acid      | Quantify detection limits     |
| Serine              | Amino acid      | Quantify detection limits     |
| Thymine             | Amino acid      | Quantify detection limits     |
| Valine              | Amino acid      | Quantify detection limits     |
| Citrate/citric acid | Organic acid    | Quantify detection limits     |
| Glutamic acid       | Organic acid    | Quantify detection limits     |
| Lactic Acid         | Organic acid    | Quantify detection limits     |
| Lauric acid         | Organic acid    | Quantify detection limits     |
| Malic acid          | Organic acid    | Quantify detection limits     |
| Succinate           | Amino acid      | Quantify detection limits     |
| Cholesterol         | Sterol          | Quantify detection limits     |
| Fructose            | Sugar           | Quantify detection limits     |
| Glucose             | Sugar           | Quantify detection limits     |
| Sucrose             | Sugar           | Quantify detection limits     |
| Trehalose           | Sugar           | Quantify detection limits     |
| Myo-inositol        | Sugar alcohol   | Quantify detection limits     |

1  
2  
3

## 1 **Supplementary Text 1. R script for peak picking for GC-MS data**

```
2 # Peak Picking.R
3 # EM Sogin
4 # Description: R script to pick peaks from GC-MS data
5
6 library(xcms)
7 library(CAMERA)
8
9 ## PEAK PICKING, RETENTION TIME GROUPING & CORRECTION WITH XCMS
10 setwd('home/path/to/files')
11 files<-list.files(pattern='.mzXML', recursive = T, full.names=T)
12 xs <- xcmsSet(files, method = "matchedFilter", fwhm = 8.4, snthresh = 1,step= 0.25, steps= 2,sigma =
13 3.56718192627824, max= 500, mzdiff= 1,index= FALSE)
14 xset1 <- group(xs,method = "density", bw=2, mzwid= 1, minfrac = 0.3, minsamp = 1,max = 500) ##
15 Initial peak grouping
16 xset2 <- retcor(xset1)
17 xset2 <- group(xset2,method = "density", bw=2, mzwid= 1, minfrac = 0.3, minsamp = 1,max = 500)
18 xset<-fillPeaks(xset2)
19
20 ## Group peaks in to pseudo-spectra using CAMERA
21 an<-xsAnnotate(xset)
22 xsF<-groupFWHM(an, perfwHM=3)
23
24 peaks<-getPeaklist(xsF)
25 peaks[is.na(peaks)]<-0
26
27 save.image('Peak_Picking_Results.RData')
28 # End
29
```

```
30
31
32
33
34
35
36
37
38
39
40
41
42
```

## 1 Supplementary references

- 2
- 3 1. Lindroth P & Mopper K (1979) High performance liquid chromatographic determination of  
4 subpicomole amounts of amino acids by precolumn fluorescence derivatization with o-  
5 Phthaldialdehyde. *Anal Chem* 51(11):1667-1674.
- 6 2. Engel A & Händel N (2011) A novel protocol for determining the concentration and composition  
7 of sugars in particulate and in high molecular weight dissolved organic matter (HMW-DOM) in  
8 seawater. *Mar Chem* 127(1-4):180-191.
- 9 3. Rocha MJ, Cruzeiro C, & Rocha E (2013) Development and validation of a GC-MS method for  
10 the evaluation of 17 endocrine disruptor compounds, including phytoestrogens and sitosterol, in  
11 coastal waters - their spatial and seasonal levels in Porto costal region (Portugal). *J Water Health*  
12 11(2):281-296.
- 13 4. Ronan JM & McHugh B (2013) A sensitive liquid chromatography/tandem mass spectrometry  
14 method for the determination of natural and synthetic steroid estrogens in seawater and marine  
15 biota, with a focus on proposed Water Framework Directive Environmental Quality Standards.  
16 *Rapid Commun Mass Spectrom* 27(7):738-746.
- 17 5. Kennicutt MC & Jeffrey LM (1981) Chemical and GC-MS characterization of marine dissolved  
18 lipids. *Mar Chem* 10:367-387.
- 19 6. Mannino A & Harvey HR (1999) Lipid composition in particulate and dissolved organic matter in  
20 the Delaware Estuary: Sources and diagenetic patterns. *Geochimica et Cosmochimica Acta*  
21 63(15):2219-2235.
- 22 7. Albert DB & Martens CS (1997) Determination of low-molecular-weight organic acid  
23 concentrations in seawater and pore-water samples via HPLC *Mar Chem* 56:27-37.
- 24  
25  
26  
27
